# Supplementary material for: Impact of green technology innovation based on IoT and industrial supply chain on the promotion of enterprise digital economy
Source: PeerJ Comput Sci. 2023 May 30;9:e1416. doi: 10.7717/peerj-cs.1416 (PMC10280464; doi:10.7717/peerj-cs.1416)
Supplement: Supplemental Information 1 [file peerj-cs-09-1416-s001.xlsx]

## Sheet: Readme
ReadMe for Defining and Measuring the Digital Economy _1997-2017
This file contains time series of digital economy estimates (1997‐2017). Data include real, current‐dollar, and price data for value added and gross output by industry and by commodity as well as digital economy compensation and employment by industry. The industries are defined according to the 2012 North American Industry Classification System (NAICS). These statistics were prepared by the Bure…
Table of Contents
Table 1. Real Value Added by Commodity
Table 2. Current-Dollar Value Added by Commodity
Table 3. Value-Added Price Indexes by Commodity
Table 4. Real Gross Output by Commodity
Table 5. Current-Dollar Gross Output
Table 6. Gross Output Price Indexes by Commodity
Table 7. Digital Economy Real Value Added by Industry
Table 8. Digital Economy Current-Dollar Value Added by Industry
Table 9. Digital Economy Value-Added Price Indexes by Industry
Table 10. Digital Economy Real Gross Output by Industry
Table 11. Digital Economy Current-Dollar Gross Output by Industry
Table 12. Digital Economy Gross Output Price Indexes by Industry
Table 13. Digital Economy Employment by Industry
Table 14. Digital Economy Compensation by Industry
Estimation Methodology and Additional Reading
This report presents BEA’s initial work to lay the foundation for a digital economy satellite account. Conceptually, a digital economy satellite account should include all goods and services related to the digital economy. However, the preliminary estimates presented here are based on goods and services that are primarily digital. There are numerous challenges to estimating the economic contribut…
Defining and Measuring the Digital Economy
Contact Information
Comments or questions about these data should be directed to BEA
Telephone: (301) 278-9171
E-mail: DigitalEconomy@bea.gov

## Sheet: Table 1
Table 1. Real Value Added by Commodity
	Billions of chained (2012) dollars
	1997	1998	1999	2000	2001	2002	2003	2004	2005	2006	2007	2008	2009	2010	2011	2012	2013	2014	2015	2016	2017
Total Economy (GDP)	11521.9	12038.3	12610.5	13131	13262.1	13493.1	13879.1	14406.4	14912.5	15338.3	15626	15604.7	15208.8	15598.8	15840.7	16197	16495.4	16899.8	17386.7	17659.2	18050.7
Digital Economy	226.019	269.949	318.274	371.107	386.347	408.727	456.426	527.524	598.084	657.847	746.066	818.786	836.258	915.729	964.321	998.253	1075.78	1121.92	1253.58	1370.13	1483.48
Digital-Enabling Infrastructure	203.673	244.23	289.762	341.231	354.976	372.427	415.455	479.681	541.888	593.079	668.55	733.411	745.476	814.069	850.808	873.367	933.743	970.434	1083.92	1173.2	1262.27
Hardware	3.53102	5.68074	8.76068	16.3075	17.9686	20.2371	27.0333	31.7924	39.5465	52.0255	64.0191	75.79	74.5716	91.0391	97.3001	77.6249	75.5636	82.282	93.8603	93.8737	104.37
Software	53.323	59.8669	82.2571	72.969	74.2032	79.5469	86.6329	104.403	114.19	112.677	137.163	137.867	141.341	151.693	160.679	164.748	176.072	185.636	201.408	225.393	240.659
Telecommunications	104.637	113.215	123.81	143.736	144.151	145.744	159.199	183.005	213.838	228.517	256.896	287.699	283.922	290.353	284.179	295.195	332.361	329.764	374.846	406.083	424.613
Support Services	107.288	124.242	128.851	132.194	141.975	149.781	159.171	178.915	186.903	204.48	211.999	230.588	245.249	280.25	308.291	335.8	349.742	372.529	414.059	447.803	490.955
E-Commerce & Digital Media	24.4012	27.0177	28.3336	27.1698	28.7057	34.9453	39.6286	46.4382	55.0349	63.9661	77.1707	85.0278	90.6406	101.567	113.473	124.886	142.087	151.57	169.748	196.734	220.705
Addendum:
Digital Goods	4.82111	7.06987	10.1141	17.6622	17.6724	20.0092	28.7746	35.9993	45.0551	59.2058	71.2717	89.2462	93.2808	111.165	114.605	104.668	109.247	117.738	135.642	142.763	153.965
Digital Services	302.627	337.689	376.624	391.04	411.213	428.999	454.442	516.533	573.94	608.331	681.966	731.086	743.872	803.91	849.278	893.586	966.477	1004.32	1118.43	1227.26	1329.32
	Percent change from preceding period
Total Economy	--	4.4819	4.75316	4.12751	0.998401	1.74181	2.86072	3.79924	3.51302	2.85532	1.8757	-0.136311	-2.53706	2.5643	1.55076	2.24927	1.84232	2.45159	2.8811	1.56729	2.21697
Digital Economy	--	19.4362	17.9016	16.5998	4.10682	5.79274	11.6701	15.577	13.3757	9.99239	13.4103	9.74712	2.13391	9.50316	5.30634	3.51881	7.76674	4.28878	11.7351	9.2971	8.27292
Digital-Enabling Infrastructure	--	19.9127	18.6433	17.7624	4.02788	4.91625	11.5533	15.4594	12.9684	9.44677	12.7252	9.70176	1.64517	9.20113	4.51301	2.65154	6.91304	3.92944	11.6948	8.23674	7.59193
Hardware	--	60.8811	54.2172	86.1445	10.1862	12.6244	33.583	17.6046	24.3897	31.5552	23.0534	18.3865	-1.60765	22.0829	6.87719	-20.2212	-2.65549	8.89115	14.0715	0.014207	11.1815
Software	--	12.2723	37.3998	-11.2916	1.69141	7.20153	8.9079	20.5122	9.37378	-1.32441	21.7307	0.513037	2.51982	7.32436	5.9237	2.5325	6.87336	5.43214	8.49628	11.9085	6.77309
Telecommunications	--	8.19794	9.35793	16.0938	0.288836	1.10485	9.23225	14.9534	16.8487	6.86439	12.4188	11.9904	-1.31282	2.26501	-2.1262	3.8761	12.5906	-0.781479	13.6711	8.33324	4.56308
Support Services	--	15.8022	3.71012	2.59429	7.39921	5.4982	6.26885	12.4043	4.46474	9.40428	3.67742	8.76829	6.35778	14.2717	10.0058	8.92306	4.15203	6.51528	11.1482	8.14962	9.63626
E-Commerce & Digital Media	--	10.7228	4.87062	-4.10727	5.6527	21.7365	13.4018	17.1836	18.512	16.2283	20.6431	10.1815	6.60114	12.0541	11.7232	10.0575	13.7735	6.67422	11.9929	15.8976	12.1848
Addendum:
Digital Goods	--	46.644	43.0586	74.6302	0.0577988	13.223	43.8065	25.1079	25.1555	31.4077	20.3796	25.2197	4.52077	19.1722	3.09437	-8.67082	4.37532	7.77182	15.2072	5.24952	7.84681
Digital Services	--	11.5858	11.53	3.82771	5.15877	4.32533	5.93073	13.663	11.114	5.99215	12.1043	7.20279	1.74893	8.07093	5.64346	5.21708	8.15719	3.9159	11.3615	9.73094	8.31591
Contribution to percent change
Total Economy	--	4.4819	4.75316	4.12751	0.998401	1.74181	2.86072	3.79924	3.51302	2.85532	1.8757	-0.136311	-2.53706	2.5643	1.55076	2.24927	1.84232	2.45159	2.8811	1.56729	2.21697
Digital Economy	--	1.08573	1.02334	0.984882	0.240918	0.322325	0.633837	0.844782	0.741345	0.557728	0.737607	0.556328	0.127487	0.575052	0.328402	0.218042	0.472759	0.268253	0.721303	0.59924	0.553079
Digital-Enabling Infrastructure	--	1.05437	1.00839	0.997483	0.224978	0.259316	0.588179	0.781156	0.666159	0.485167	0.639741	0.501796	0.0886185	0.497926	0.248677	0.145089	0.368374	0.213605	0.621514	0.457432	0.432252
Hardware	--	0.566535	0.470491	0.701394	0.0965834	0.0943128	0.230038	0.129866	0.170518	0.215145	0.157963	0.119714	-0.0104469	0.131874	0.0447366	-0.128	-0.0125233	0.0388817	0.0637572	6.92289e-05	0.0517148
Software	--	0.0818971	0.26554	-0.105578	0.0134854	0.056743	0.0707491	0.161489	0.0808178	-0.0116377	0.177894	0.00493278	0.0241527	0.0720778	0.0594611	0.0259964	0.0694526	0.056632	0.0893705	0.130389	0.0804685
Telecommunications	--	0.192852	0.217072	0.363112	0.00678639	0.0245366	0.192591	0.307014	0.347385	0.143526	0.248138	0.244814	-0.0283146	0.0474411	-0.0422082	0.0710306	0.226377	-0.0149513	0.236966	0.147781	0.080544
Support Services	--	0.213088	0.0552875	0.0385544	0.108123	0.0837234	0.0948003	0.182787	0.0674383	0.138133	0.0557472	0.132334	0.103227	0.246534	0.186687	0.176061	0.0850677	0.133042	0.231421	0.179192	0.219524
E-Commerce & Digital Media	--	0.0313599	0.0149546	-0.0126014	0.0159399	0.063009	0.0456582	0.0636253	0.0751866	0.0725606	0.0978656	0.0545316	0.0388686	0.0771254	0.0797253	0.0729533	0.104385	0.054648	0.0997885	0.141808	0.120827
Addendum:
Digital Goods	--	0.574599	0.493913	0.800062	0.000722775	0.123197	0.365359	0.229538	0.225953	0.277381	0.180774	0.20523	0.0375139	0.150436	0.0252485	-0.0654996	0.0274981	0.0470542	0.0907249	0.0327763	0.0481405
Digital Services	--	0.511133	0.529432	0.184819	0.240195	0.199128	0.268478	0.615244	0.515392	0.280347	0.556833	0.351098	0.0899732	0.424615	0.303154	0.283541	0.445261	0.221199	0.630578	0.566464	0.504938
Notes: Value added by commodity is prepared by (1) calculating ratios of commodity output to total industry output for each industry and digital commodity, (2) applying these ratios to each industry’s value added, and (3) aggregating the result by digital commodity. These estimates are based on data valued in producers’ prices and exclude transportation costs and wholesale and retail trade markup…

## Sheet: Table 2
Table 2. Current-Dollar Value Added by Commodity
	Billions of dollars
	1997	1998	1999	2000	2001	2002	2003	2004	2005	2006	2007	2008	2009	2010	2011	2012	2013	2014	2015	2016	2017
Total Economy (GDP)	8577.6	9062.8	9630.7	10252.3	10581.8	10936.4	11458.2	12213.7	13036.6	13814.6	14451.9	14712.8	14448.9	14992.1	15542.6	16197	16784.9	17521.7	18219.3	18707.2	19485.4
Digital Economy	505.28	540.115	582.772	627.288	605.631	614.927	647.747	705.826	755.874	787.132	849.622	891.119	893.637	944.655	978.322	998.253	1067.6	1096.48	1193.47	1276.97	1351.28
Digital-Enabling Infrastructure	480.109	512.136	553.331	598.242	574.566	577.515	604.893	655.286	696.374	718.719	772.031	804.388	800.56	840.625	864.458	873.367	928.002	949.464	1029.91	1087.75	1143.43
Hardware	100.29	96.7101	94.8836	118.085	86.0195	82.4323	91.7429	93.3609	99.3039	106.4	104.797	100.628	89.8255	102.202	101.301	77.6249	74.4463	80.2719	90.4805	88.0411	96.3208
Software	57.7129	64.4386	89.5505	82.1348	84.5801	89.4361	93.5245	107.526	116.24	114.77	139.273	142.003	144.694	151.668	161.448	164.748	176.837	185.978	200.2	224.873	239.012
Telecommunications	205.478	216.691	226.03	247.602	240.117	235.968	245.205	265.952	286.401	284.977	308.35	321.647	311.301	304.14	290.831	295.195	329.151	316.496	334.137	341.767	339.585
Support Services	116.629	134.295	142.867	150.42	163.849	169.678	174.421	188.447	194.429	212.572	219.61	240.11	254.739	282.614	310.878	335.8	347.567	366.718	405.097	433.068	468.511
E-Commerce & Digital Media	25.1704	27.9794	29.441	29.0465	31.0651	37.4125	42.8539	50.5401	59.4997	68.4132	77.5917	86.7312	93.0768	104.03	113.864	124.886	139.601	147.014	163.555	189.216	207.849
Addendum:
Digital Goods	127.803	124.022	121.865	151.331	107.503	103.091	116.293	119.764	128.609	137.287	133.281	130.111	120.159	128.379	122.373	104.668	105.082	107.785	117.891	116.633	124.104
Digital Services	377.476	416.093	460.907	475.957	498.128	511.836	531.454	586.063	627.264	649.845	716.342	761.008	773.478	816.276	855.949	893.586	962.521	988.694	1075.58	1160.33	1227.17
	Share of total (percent)
Total Economy	100	100	100	100	100	100	100	100	100	100	100	100	100	100	100	100	100	100	100	100	100
Digital Economy	5.89069	5.95969	6.05119	6.11851	5.72333	5.62276	5.65313	5.77897	5.79809	5.69783	5.87897	6.05676	6.18481	6.30102	6.29446	6.1632	6.3605	6.25783	6.55058	6.82606	6.93482
Digital-Enabling Infrastructure	5.59724	5.65096	5.74549	5.83519	5.42976	5.28066	5.27913	5.36517	5.34168	5.2026	5.34207	5.46727	5.54063	5.60712	5.56186	5.39215	5.52879	5.41879	5.65288	5.8146	5.86813
Hardware	1.16921	1.06711	0.985221	1.15179	0.812901	0.753742	0.800674	0.764395	0.761732	0.770202	0.725143	0.683946	0.621677	0.681708	0.651764	0.479255	0.443532	0.458128	0.496619	0.470627	0.494323
Software	0.672833	0.711024	0.929844	0.801135	0.799297	0.817784	0.816224	0.880372	0.891643	0.830788	0.963702	0.965169	1.00142	1.01165	1.03875	1.01715	1.05355	1.06141	1.09884	1.20207	1.22662
Telecommunications	2.39551	2.391	2.34697	2.41509	2.26915	2.15764	2.13999	2.17749	2.1969	2.06287	2.13363	2.18617	2.1545	2.02867	1.87119	1.82253	1.961	1.80631	1.83397	1.82693	1.74277
Support Services	1.35969	1.48183	1.48346	1.46718	1.54841	1.5515	1.52224	1.54291	1.49141	1.53875	1.51959	1.63198	1.76304	1.88509	2.00017	2.07322	2.07071	2.09294	2.22345	2.31498	2.40442
E-Commerce & Digital Media	0.293444	0.308728	0.305699	0.283317	0.293571	0.342091	0.374002	0.413798	0.456405	0.495224	0.536896	0.589495	0.644179	0.693899	0.732595	0.771044	0.831707	0.839042	0.897703	1.01146	1.06669
Addendum:
Digital Goods	1.48997	1.36847	1.26538	1.47607	1.01592	0.942641	1.01493	0.980567	0.986525	0.993781	0.922236	0.884339	0.831611	0.856313	0.787339	0.646215	0.62605	0.615149	0.647069	0.623466	0.636906
Digital Services	4.40072	4.59122	4.78581	4.64244	4.7074	4.68011	4.6382	4.7984	4.81156	4.70405	4.95673	5.17242	5.3532	5.44471	5.50712	5.51698	5.73445	5.64268	5.90351	6.2026	6.29792
Notes: Value added by commodity is prepared by (1) calculating ratios of commodity output to total industry output for each industry and digital commodity, (2) applying these ratios to each industry’s value added, and (3) aggregating the result by digital commodity. These estimates are based on data valued in producers’ prices and exclude transportation costs and wholesale and retail trade markup…
																							0.108552	Hardware
																							0.112911	E-Commerce & Digital Media
																							0.214016	Software
																							0.264969	Telecommunications
																							0.299552	Support Services

## Sheet: Table 3
Table 3. Value-Added Price Indexes by Commodity
	2012=100
	1997	1998	1999	2000	2001	2002	2003	2004	2005	2006	2007	2008	2009	2010	2011	2012	2013	2014	2015	2016	2017
Total Economy	74.446	75.267	76.346	78.069	79.822	81.039	82.567	84.778	87.407	90.074	92.498	94.264	94.999	96.109	98.112	100	101.773	103.687	104.757	105.899	107.932
Digital Economy	223.556	200.081	183.104	169.032	156.758	150.449	141.917	133.8	126.383	119.653	113.88	108.834	106.861	103.159	101.452	100	99.2395	97.7321	95.2048	93.2004	91.0885
Digital-Enabling Infrastructure	235.726	209.694	190.96	175.319	161.861	155.068	145.598	136.609	128.509	121.184	115.478	109.678	107.389	103.262	101.604	100	99.3851	97.8391	95.0172	92.7161	90.5849
Hardware	2840.25	1702.42	1083.06	724.116	478.72	407.333	339.37	293.658	251.107	204.516	163.696	132.772	120.455	112.262	104.112	100	98.5215	97.557	96.3991	93.7868	92.2877
Software	108.233	107.636	108.867	112.561	113.984	112.432	107.955	102.991	101.795	101.857	101.538	103	102.373	99.9837	100.479	100	100.435	100.184	99.4	99.7694	99.3156
Telecommunications	196.371	191.398	182.562	172.262	166.573	161.906	154.024	145.325	133.933	124.707	120.029	111.8	109.643	104.748	102.341	100	99.0342	95.9765	89.1398	84.1619	79.9751
Support Services	108.706	108.092	110.878	113.787	115.407	113.284	109.581	105.328	104.027	103.957	103.59	104.129	103.87	100.844	100.839	100	99.3781	98.4402	97.8355	96.7094	95.4286
E-Commerce & Digital Media	103.153	103.56	103.909	106.907	108.22	107.061	108.139	108.833	108.113	106.953	100.546	102.004	102.688	102.426	100.345	100	98.2505	96.9942	96.3517	96.1786	94.1747
Addendum:
Digital Goods	2650.91	1754.23	1204.91	856.808	608.309	515.217	404.151	332.683	285.449	231.881	187.004	145.789	128.814	115.486	106.778	100	96.1874	91.5465	86.9136	81.6971	80.6052
Digital Services	124.731	123.216	122.376	121.716	121.134	119.307	116.945	113.459	109.289	106.822	105.039	104.091	103.978	101.537	100.784	100	99.5907	98.4438	96.1686	94.5463	92.3158
	Percent change from preceding period
Total Economy	--	1.10281	1.43356	2.25683	2.24545	1.52464	1.88551	2.67783	3.10104	3.05124	2.69112	1.90923	0.779725	1.16843	2.08409	1.92433	1.773	1.88066	1.03195	1.09014	1.91975
Digital Economy	--	-10.501	-8.48485	-7.68536	-7.26113	-4.02466	-5.67108	-5.71967	-5.54357	-5.32492	-4.82436	-4.43105	-1.81271	-3.46481	-1.65459	-1.43124	-0.76055	-1.51895	-2.58595	-2.10529	-2.26601
Digital-Enabling Infrastructure	--	-11.0431	-8.93387	-8.19111	-7.67626	-4.19673	-6.107	-6.17398	-5.92925	-5.69961	-4.7084	-5.0232	-2.08673	-3.84289	-1.60543	-1.57906	-0.61491	-1.55558	-2.88423	-2.42172	-2.29864
Hardware	--	-40.061	-36.381	-33.1418	-33.8891	-14.9121	-16.6849	-13.4697	-14.49	-18.5543	-19.9591	-18.8915	-9.27621	-6.80207	-7.25967	-3.94967	-1.47851	-0.978964	-1.18691	-2.70984	-1.59847
Software	--	-0.550921	1.14291	3.39369	1.26439	-1.3621	-3.98182	-4.59813	-1.16096	0.0607558	-0.312942	1.43979	-0.609409	-2.33367	0.495078	-0.476411	0.434503	-0.249467	-0.782464	0.371572	-0.454792
Telecommunications	--	-2.53285	-4.61645	-5.64181	-3.30234	-2.8017	-4.8685	-5.64751	-7.83913	-6.8888	-3.75091	-6.85604	-1.92918	-4.46415	-2.29876	-2.28705	-0.965825	-3.08749	-7.12334	-5.58434	-4.97467
Support Services	--	-0.565166	2.57721	2.62384	1.42375	-1.83974	-3.26865	-3.88142	-1.235	-0.0668586	-0.353486	0.520697	-0.249147	-2.91329	-0.0045508	-0.832217	-0.621875	-0.943754	-0.614356	-1.15097	-1.32437
E-Commerce & Digital Media	--	0.39471	0.336639	2.88587	1.22749	-1.07108	1.00755	0.641788	-0.661753	-1.07336	-5.99031	1.44991	0.67102	-0.255384	-2.03172	-0.343667	-1.74954	-1.27868	-0.66232	-0.179711	-2.08352
Addendum:
Digital Goods	--	-33.8255	-31.314	-28.8901	-29.0029	-15.3033	-21.5571	-17.6835	-14.1979	-18.7663	-19.3536	-22.0395	-11.6436	-10.3469	-7.53963	-6.34805	-3.81258	-4.82484	-5.06069	-6.00194	-1.33662
Digital Services	--	-1.2147	-0.681327	-0.539712	-0.477969	-1.50822	-1.98038	-2.98051	-3.67524	-2.25705	-1.66955	-0.902407	-0.10841	-2.34825	-0.741344	-0.777724	-0.409327	-1.15163	-2.31116	-1.68689	-2.35917
U.S. Bureau of Economic Analysis

## Sheet: Table 4
Table 4. Real Gross Output by Commodity
	Billions of chained (2012) dollars
	1997	1998	1999	2000	2001	2002	2003	2004	2005	2006	2007	2008	2009	2010	2011	2012	2013	2014	2015	2016	2017
Total Economy	21628.9	22792.6	23954.8	25025.4	25018.4	25181.8	25753.9	26690.2	27743	28362.3	28917.5	28533.6	26952	27832	28439.1	29186.8	29797.7	30666.6	31368.6	31972.4	32792.6
Digital Economy	630.137	740.828	884.577	1025.15	1038.29	1000.82	1025.75	1088.07	1177.07	1259.26	1349.6	1418.43	1392.1	1493.24	1582.98	1658.4	1716.69	1808.63	1898.43	2024.17	2154.23
Digital-Enabling Infrastructure	582.49	688.131	824.208	959.503	974.006	933.603	951.159	1004.98	1080.54	1149.61	1223.65	1285.36	1253.03	1335.57	1403.19	1451.97	1493.6	1563.65	1629.08	1729.83	1830.92
Hardware	50.5185	65.4487	83.5549	109.322	106.197	102.034	109.819	115.57	128.906	144.785	161.417	163.319	136.903	139.746	140.448	128.961	127.422	127.067	132.191	127.509	135.106
Software	86.6935	98.7999	119.813	125.62	134.627	134.359	134.911	157.722	168.01	175.173	184.668	190.232	187.901	195.141	204.788	208.811	221.179	233.245	241.9	258.988	276.562
Telecommunications	290.403	325.835	380.456	444.552	458.719	425.741	428.796	443.812	476.969	502.538	518.544	545.13	540.456	566.814	585.571	600.965	615.74	647.586	685.619	733.446	757.488
Support Services	187.921	222.318	258.951	277.578	276.23	276.074	278.091	290.535	306.278	322.996	353.459	382.299	386.432	433.225	472.152	513.234	529.203	555.614	569.562	609.925	660.372
E-Commerce & Digital Media	48.3889	51.2118	57.1314	59.9064	57.6893	62.4261	71.1088	80.1764	94.3571	108.061	125.098	132.227	138.645	157.414	179.685	206.424	223.129	245.074	269.405	294.249	322.907
Addendum:
ICT Sector	640.9	755.6	899.9	1054.9	1059.9	1030	1053.6	1112.8	1198.1	1290.2	1376.8	1455.5	1418.3	1520	1612.3	1684.9	1744.2	1840.6	1926.2	2058.9	2190.3
Digital Goods	72.8956	90.825	114.823	149.188	141.93	120.982	132.805	143.214	159.912	181.425	195.882	202.978	172.695	183.878	185.314	177.105	179.119	178.295	190.257	189.564	201.627
Digital Services	589.684	671.84	780.449	857.814	891.485	894.633	898.72	948.913	1017.78	1071.73	1146.47	1208.68	1218.29	1308.33	1397.27	1481.29	1537.51	1629.8	1707.84	1832.85	1950.72
	Percent change from preceding period
Total Economy	--	5.3803	5.09902	4.46925	-0.0279716	0.653119	2.27188	3.63557	3.94452	2.23227	1.95753	-1.32757	-5.54294	3.26506	2.1813	2.62913	2.09307	2.916	2.28914	1.92485	2.56534
Digital Economy	--	17.5662	19.4039	15.8911	1.2823	-3.60859	2.49021	6.07621	8.17961	6.98238	7.17403	5.0998	-1.85586	7.26476	6.01022	4.76395	3.51526	5.35542	4.96509	6.62331	6.42552
Digital-Enabling Infrastructure	--	18.1362	19.7749	16.415	1.51152	-4.14807	1.88043	5.6581	7.51913	6.39157	6.44067	5.04299	-2.51489	6.58749	5.0624	3.47675	2.86684	4.6899	4.18457	6.18435	5.84415
Hardware	--	29.5538	27.6647	30.8389	-2.85879	-3.92043	7.6304	5.23658	11.5392	12.3188	11.4868	1.17887	-16.1744	2.07627	0.502615	-8.17882	-1.19357	-0.278281	4.03217	-3.54217	5.95831
Software	--	13.9645	21.2682	4.84724	7.16981	-0.199014	0.410976	16.9079	6.52271	4.26354	5.42024	3.01304	-1.22521	3.85282	4.94389	1.9642	5.92334	5.45493	3.71073	7.06436	6.78567
Telecommunications	--	12.201	16.7634	16.8471	3.18667	-7.1891	0.717686	3.50174	7.47092	5.36078	3.18509	5.12713	-0.85745	4.87694	3.3092	2.62891	2.45848	5.17199	5.87302	6.97586	3.27789
Support Services	--	18.3042	16.4777	7.1933	-0.485582	-0.0563965	0.730455	4.47468	5.41861	5.45866	9.43146	8.1593	1.0811	12.1089	8.98525	8.70118	3.11133	4.99084	2.51032	7.08666	8.27107
E-Commerce & Digital Media	--	5.83373	11.559	4.85727	-3.70085	8.21078	13.9087	12.7518	17.6868	14.5239	15.766	5.6982	4.85376	13.538	14.1475	14.8813	8.09249	9.83527	9.92779	9.22197	9.73941
Addendum:
Digital Goods	--	24.5959	26.4227	29.9279	-4.86482	-14.7594	9.77272	7.83735	11.6599	13.4532	7.96857	3.6225	-14.9193	6.47519	0.780939	-4.42959	1.13688	-0.459756	6.70884	-0.363949	6.36357	-100	#DIV/0!	#DIV/0!	#DIV/0!	#DIV/0!	#DIV/0!	#DIV/0!	#DIV/0!	#DIV/0!	#DIV/0!	#DIV/0!	#DIV/0!	#DIV/0!	#DIV/0!	#DIV/0!	#DIV/0!	#DIV/0!	#DIV/0!	#DIV/0!	#DIV/0!	#DIV/0!	#DIV/0!	#DIV/0!	#DIV/0!	#DIV/0!	#DIV/0!	#DIV/0!	#DIV/0!
Digital Services	--	13.9323	16.1659	9.91291	3.92525	0.353027	0.4569	5.58488	7.25775	5.30033	6.97378	5.4268	0.794859	7.39076	6.7978	6.01313	3.79543	6.00264	4.78806	7.3196	6.43114	-100	#DIV/0!	#DIV/0!	#DIV/0!	#DIV/0!	#DIV/0!	#DIV/0!	#DIV/0!	#DIV/0!	#DIV/0!	#DIV/0!	#DIV/0!	#DIV/0!	#DIV/0!	#DIV/0!	#DIV/0!	#DIV/0!	#DIV/0!	#DIV/0!	#DIV/0!	#DIV/0!	#DIV/0!	#DIV/0!	#DIV/0!	#DIV/0!	#DIV/0!	#DIV/0!	#DIV/0!
	Contribution to percent change
Total Economy	--	5.3803	5.09902	4.46925	-0.0279716	0.653119	2.27188	3.63557	3.94452	2	1.8	-1.7	-6	3	1.8	2.5	1.7	3.1	2.3	1.8	1.8
Digital Economy	--	1.09325	1.25603	1.08729	0.0900096	-0.247129	0.155648	0.35763	0.460193	0.38314	0.388928	0.273168	-0.102719	0.40983	0.336691	0.268053	0.197847	0.299133	0.279713	0.379221	0.375384	#REF!	#REF!	#REF!	#REF!	#REF!	#REF!	#REF!	#REF!	#REF!	#REF!	#REF!	#REF!	#REF!	#REF!	#REF!	#REF!	#REF!	#REF!	#REF!	#REF!	#REF!	#REF!	#REF!	#REF!	#REF!	#REF!	#REF!	#REF!
Digital-Enabling Infrastructure	--	1.07622	1.22204	1.07216	0.101552	-0.271639	0.111555	0.313421	0.395528	0.325162	0.321805	0.246809	-0.126751	0.335415	0.25403	0.173559	0.141329	0.228074	0.203683	0.302919	0.290456	#REF!	#REF!	#REF!	#REF!	#REF!	#REF!	#REF!	#REF!	#REF!	#REF!	#REF!	#REF!	#REF!	#REF!	#REF!	#REF!	#REF!	#REF!	#REF!	#REF!	#REF!	#REF!	#REF!	#REF!	#REF!	#REF!	#REF!	#REF!
Hardware	--	0.44992	0.405004	0.439214	-0.0410747	-0.0466361	0.0783465	0.0507382	0.101969	0.103695	0.0926412	0.00899503	-0.115191	0.0124166	0.00275363	-0.0413136	-0.00519928	-0.0011421	0.0158199	-0.0139424	0.0215469	#REF!	#REF!	#REF!	#REF!	#REF!	#REF!	#REF!	#REF!	#REF!	#REF!	#REF!	#REF!	#REF!	#REF!	#REF!	#REF!	#REF!	#REF!	#REF!	#REF!	#REF!	#REF!	#REF!	#REF!	#REF!	#REF!	#REF!	#REF!
Software	--	0.0807976	0.132564	0.034678	0.0511811	-0.00150136	0.0029635	0.11282	0.046394	0.0299465	0.0377125	0.0210661	-0.00889938	0.0288488	0.0358319	0.0142714	0.0421538	0.039736	0.0275434	0.0533593	0.0531755	#REF!	#REF!	#REF!	#REF!	#REF!	#REF!	#REF!	#REF!	#REF!	#REF!	#REF!	#REF!	#REF!	#REF!	#REF!	#REF!	#REF!	#REF!	#REF!	#REF!	#REF!	#REF!	#REF!	#REF!	#REF!	#REF!	#REF!	#REF!
Telecommunications	--	0.325458	0.461835	0.490678	0.0988513	-0.222655	0.0196706	0.0890314	0.17638	0.121662	0.0703397	0.10752	-0.0184278	0.10745	0.0706038	0.0547872	0.0501248	0.103176	0.116289	0.13899	0.0660386	#REF!	#REF!	#REF!	#REF!	#REF!	#REF!	#REF!	#REF!	#REF!	#REF!	#REF!	#REF!	#REF!	#REF!	#REF!	#REF!	#REF!	#REF!	#REF!	#REF!	#REF!	#REF!	#REF!	#REF!	#REF!	#REF!	#REF!	#REF!
Support Services	--	0.220049	0.222633	0.107589	-0.00740607	-0.000846742	0.0105746	0.0608309	0.0707843	0.0698588	0.121112	0.109227	0.0157676	0.186699	0.14484	0.145814	0.0542492	0.0863038	0.0440303	0.124511	0.149695	#REF!	#REF!	#REF!	#REF!	#REF!	#REF!	#REF!	#REF!	#REF!	#REF!	#REF!	#REF!	#REF!	#REF!	#REF!	#REF!	#REF!	#REF!	#REF!	#REF!	#REF!	#REF!	#REF!	#REF!	#REF!	#REF!	#REF!	#REF!
E-Commerce & Digital Media	--	0.0170305	0.0339896	0.0151298	-0.0115421	0.0245106	0.0440927	0.0442095	0.0646647	0.0579778	0.0671228	0.0263589	0.0240315	0.0744155	0.0826614	0.0944942	0.0565186	0.071059	0.0760296	0.0763018	0.084928	#REF!	#REF!	#REF!	#REF!	#REF!	#REF!	#REF!	#REF!	#REF!	#REF!	#REF!	#REF!	#REF!	#REF!	#REF!	#REF!	#REF!	#REF!	#REF!	#REF!	#REF!	#REF!	#REF!	#REF!	#REF!	#REF!	#REF!	#REF!
Addendum:
Digital Goods	--	0.512097	0.534935	0.609877	-0.104037	-0.264461	0.132796	0.0997963	0.137319	0.151722	0.0874971	0.0361933	-0.139279	0.0503714	0.00573018	-0.029802	0.00674437	-0.00257185	0.034778	-0.00188754	0.0309412
Digital Services	--	0.581158	0.721091	0.477411	0.194047	0.0173325	0.0228521	0.257834	0.322874	0.231418	0.301431	0.236974	0.0365599	0.359459	0.330961	0.297855	0.191103	0.301704	0.244935	0.381108	0.344443
Note: These estimates are based on data valued in producers’ prices and exclude transportation costs and wholesale and retail trade markups, with the exception of retail trade markups associated with e-commerce transactions.
U.S. Bureau of Economic Analysis
[truncated: 5,000 more columns]

## Sheet: Table 5
Table 5. Current-Dollar Gross Output
	Billions of dollars
	1997	1998	1999	2000	2001	2002	2003	2004	2005	2006	2007	2008	2009	2010	2011	2012	2013	2014	2015	2016	2017
Total Economy	15393.3	16216.8	17272.3	18623.9	18888.3	19178.3	20141.2	21690.2	23512.9	24931.4	26238.5	26989.2	24919.5	26422.4	27999.5	29186.8	30291.3	31705.3	32086.1	32776.4	34445.6	#REF!	#REF!	#REF!	#REF!	#REF!	#REF!	#REF!	#REF!	#REF!	#REF!	#REF!	#REF!	#REF!	#REF!	#REF!	#REF!	#REF!	#REF!	#REF!	#REF!	#REF!	#REF!	#REF!	#REF!	#REF!	#REF!	#REF!	#REF!
Digital Economy	998.73	1087.94	1227.28	1361.92	1314.84	1234.45	1224.98	1262.84	1329.45	1390.45	1451.47	1492.24	1438.84	1512.22	1592.52	1658.4	1712.08	1791.31	1850.02	1949.6	2050.13
Digital-Enabling Infrastructure	953.968	1040.21	1173.41	1303.83	1258.1	1173.29	1154.3	1182.03	1233.96	1280.86	1328.71	1360	1300.35	1354.36	1413.94	1451.97	1490.91	1549.43	1584.92	1658.62	1734.55
Hardware	264.527	264.59	272.114	297.075	234.628	208.133	205.251	202.366	210.527	215.899	214.342	196.259	154.178	150.792	144.588	128.961	125.874	124.508	127.914	120.526	126.517
Software	89.1555	101.368	123.865	133.402	144.043	141.896	138.878	157.824	167.444	176.116	185.875	194.397	190.863	194.412	205.252	208.811	222.472	234.705	242.122	260.307	277.257
Telecommunications	414.969	455.693	518.148	588.575	593.398	539.808	529	532.571	550.995	564.164	571.968	579.242	562.895	576.307	590.515	600.965	613.673	636.314	648.656	675.4	682.847
Support Services	185.316	218.556	259.284	284.775	286.03	283.455	281.168	289.267	304.993	324.678	356.521	390.104	392.417	432.848	473.582	513.234	528.888	553.9	566.228	602.384	647.93
E-Commerce & Digital Media	44.7619	47.7283	53.8669	58.0883	56.7435	61.1598	70.6857	80.81	95.4912	109.595	122.764	132.241	138.493	157.862	178.585	206.424	221.172	241.882	265.098	290.979	315.578
Addendum:
Digital Goods	353.38	358.442	382.21	431.702	352.108	279.236	272.782	269.118	281.554	292.786	283.892	259.718	203.084	201.841	194.306	177.105	173.945	166.988	170.741	161.844	170.986
Digital Services	645.35	729.493	845.068	930.214	962.734	955.215	952.201	993.72	1047.9	1097.67	1167.58	1232.53	1235.76	1310.38	1398.22	1481.29	1538.13	1624.32	1679.28	1787.75	1879.14
	Share of total (percent)
Total Economy	100	100	100	100	100	100	100	100	100	100	100	100	100	100	100	100	100	100	100	100	100
Digital Economy	6.48808	6.70869	7.10547	7.31273	6.96115	6.43671	6.08197	5.82216	5.65413	5.57711	5.53183	5.52904	5.77397	5.72325	5.68768	5.68201	5.65205	5.64987	5.7658	5.94817	5.95179
Digital-Enabling Infrastructure	6.19729	6.41438	6.7936	7.00083	6.66073	6.11781	5.73102	5.44959	5.24801	5.13753	5.06395	5.03906	5.21821	5.1258	5.04987	4.97475	4.9219	4.88697	4.93959	5.0604	5.03563
Hardware	1.71846	1.63158	1.57544	1.59513	1.24219	1.08525	1.01906	0.932983	0.895368	0.865973	0.816899	0.727176	0.618706	0.570697	0.516396	0.441848	0.415544	0.392705	0.398659	0.367723	0.367296
Software	0.579184	0.62508	0.717132	0.716294	0.762602	0.739878	0.689523	0.727626	0.712137	0.706404	0.708404	0.720278	0.765917	0.735785	0.733057	0.715429	0.734441	0.74027	0.754602	0.794189	0.804912
Telecommunications	2.69578	2.81001	2.99988	3.16032	3.14162	2.81468	2.62646	2.45535	2.34337	2.26287	2.17988	2.1462	2.25885	2.18113	2.10902	2.05903	2.02591	2.00696	2.02161	2.06063	1.98239
Support Services	1.20387	1.34771	1.50115	1.52908	1.51433	1.478	1.39598	1.33363	1.29713	1.30229	1.35877	1.44541	1.57474	1.63818	1.69139	1.75845	1.746	1.74703	1.76472	1.83786	1.88102
E-Commerce & Digital Media	0.290788	0.294314	0.311868	0.311902	0.300416	0.318901	0.350951	0.372564	0.406123	0.439586	0.467879	0.489979	0.55576	0.597455	0.637814	0.707251	0.73015	0.762906	0.826208	0.88777	0.916163
Addendum:
Digital Goods	2.29568	2.21032	2.21285	2.318	1.86416	1.456	1.35435	1.24073	1.19745	1.17437	1.08197	0.962304	0.81496	0.763902	0.693961	0.606798	0.574241	0.526687	0.532134	0.493781	0.496393
Digital Services	4.19241	4.49838	4.89262	4.99473	5.09699	4.98071	4.72763	4.58142	4.45669	4.40275	4.44986	4.56673	4.95901	4.95935	4.99372	5.07521	5.0778	5.12319	5.23366	5.45439	5.4554
Note: These estimates are based on data valued in producers’ prices and exclude transportation costs and wholesale and retail trade markups, with the exception of retail trade markups associated with e-commerce transactions.
U.S. Bureau of Economic Analysis
[truncated: 5,000 more columns]

## Sheet: Table 6
Table 6. Gross Output Price Indexes by Commodity
	2012=100
	1997	1998	1999	2000	2001	2002	2003	2004	2005	2006	2007	2008	2009	2010	2011	2012	2013	2014	2015	2016	2017
Total Economy	71.17	71.149	72.103	74.42	75.497	76.159	78.207	81.267	84.752	87.903	90.735	94.587	92.459	94.935	98.454	100	101.656	103.387	102.287	102.515	105.041
Digital Economy	158.494	146.854	138.742	132.851	126.635	123.344	119.424	116.062	112.945	110.418	107.548	105.204	103.358	101.271	100.603	100	99.7312	99.0424	97.45	96.3159	95.1676
Digital-Enabling Infrastructure	163.774	151.164	142.368	135.886	129.168	125.673	121.357	117.617	114.198	111.417	108.586	105.807	103.777	101.406	100.766	100	99.8198	99.0907	97.2895	95.8835	94.7367
Hardware	523.624	404.272	325.671	271.743	220.936	203.985	186.899	175.103	163.319	149.117	132.788	120.169	112.618	107.904	102.948	100	98.7848	97.9859	96.7647	94.524	93.6432
Software	102.84	102.599	103.382	106.194	106.994	105.609	102.94	100.064	99.6632	100.538	100.653	102.19	101.576	99.6265	100.227	100	100.584	100.626	100.092	100.509	100.251
Telecommunications	142.894	139.854	136.191	132.397	129.36	126.793	123.369	119.999	115.52	112.263	110.303	106.258	104.152	101.675	100.844	100	99.6644	98.2594	94.6089	92.0858	90.1463
Support Services	98.6139	98.3077	100.129	102.593	103.548	102.673	101.106	99.5636	99.5807	100.521	100.866	102.041	101.549	99.9128	100.303	100	99.9405	99.6915	99.4147	98.7637	98.1159
E-Commerce & Digital Media	92.5045	93.1978	94.286	96.9651	98.3605	97.9714	99.405	100.79	101.202	101.419	98.1342	100.011	99.8903	100.284	99.3878	100	99.123	98.6973	98.4014	98.8886	97.7302
Addendum:
Digital Goods	484.776	394.652	332.867	289.368	248.086	230.808	205.4	187.913	176.068	161.381	144.93	127.954	117.597	109.769	104.852	100	97.1117	93.658	89.7426	85.3768	84.8028
Digital Services	109.44	108.581	108.28	108.44	107.992	106.772	105.951	104.722	102.959	102.42	101.841	101.972	101.434	100.156	100.068	100	100.04	99.6637	98.3277	97.5397	96.3308
	Percent change from preceding period
Total Economy	--	-0.0295068	1.34085	3.21346	1.44719	0.876856	2.68911	3.91269	4.28833	3.71791	3.22173	4.24533	-2.24978	2.67794	3.70675	1.57028	1.656	1.7028	-1.06396	0.222902	2.46403
Digital Economy	--	-7.34419	-5.52405	-4.24589	-4.6787	-2.59933	-3.17811	-2.81494	-2.68511	-2.23765	-2.59922	-2.17952	-1.75512	-2.01849	-0.660308	-0.599049	-0.268797	-0.690672	-1.60775	-1.16378	-1.19227
Digital-Enabling Infrastructure	--	-7.69973	-5.81876	-4.5533	-4.94404	-2.70504	-3.43476	-3.08138	-2.90709	-2.4353	-2.54134	-2.55854	-1.9194	-2.28382	-0.631349	-0.760435	-0.180177	-0.730426	-1.81772	-1.44519	-1.19605
Hardware	--	-22.7935	-19.4425	-16.5592	-18.6965	-7.67257	-8.37594	-6.31178	-6.72977	-8.69586	-10.9501	-9.50339	-6.28323	-4.18583	-4.59354	-2.8633	-1.21523	-0.808677	-1.2463	-2.31561	-0.931898
Software	--	-0.233918	0.763077	2.72016	0.752678	-1.29378	-2.52736	-2.79388	-0.400832	0.878173	0.114383	1.52613	-0.600321	-1.91928	0.602331	-0.226113	0.584334	0.0415603	-0.530753	0.41659	-0.256686
Telecommunications	--	-2.12777	-2.61894	-2.78562	-2.29415	-1.98465	-2.70053	-2.73097	-3.7327	-2.81955	-1.74622	-3.6673	-1.98176	-2.37813	-0.816807	-0.837315	-0.335613	-1.40974	-3.71511	-2.66694	-2.10615
Support Services	--	-0.310517	1.85221	2.46105	0.930977	-0.844627	-1.52605	-1.52596	0.0172055	0.943891	0.343722	1.16522	-0.483029	-1.61083	0.390507	-0.302075	-0.0595473	-0.249069	-0.277685	-0.65488	-0.655877
E-Commerce & Digital Media	--	0.749492	1.16759	2.84147	1.43908	-0.395506	1.46328	1.39343	0.408531	0.214541	-3.23891	1.91247	-0.120628	0.394355	-0.893878	0.615937	-0.877047	-0.429434	-0.299767	0.49514	-1.17149
Addendum:
Digital Goods	--	-18.5908	-15.6555	-13.0679	-14.2665	-6.96435	-11.0084	-8.51336	-6.30361	-8.34179	-10.1939	-11.7133	-8.09439	-6.65605	-4.47939	-4.62777	-2.88831	-3.55641	-4.18052	-4.8648	-0.672283
Digital Services	--	-0.78454	-0.277765	0.148017	-0.412983	-1.13007	-0.768943	-1.15981	-1.68368	-0.523083	-0.565246	0.128796	-0.528124	-1.25943	-0.088534	-0.0676932	0.0404051	-0.376598	-1.3405	-0.801394	-1.23932
U.S. Bureau of Economic Analysis

## Sheet: Table 7
Table 7. Digital Economy Real Value Added by Industry
Billions of chained (2012) dollars
Industries						1997	1998	1999	2000	2001	2002	2003	2004	2005	2006	2007	2008	2009	2010	2011	2012	2013	2014	2015	2016	2017
All Industries						226.019	269.949	318.274	371.107	386.347	408.727	456.426	527.524	598.084	657.847	746.066	818.786	836.258	915.729	964.321	998.253	1075.78	1121.92	1253.58	1370.13	1483.48
	Private industries					219.905	263.152	311.268	363.925	378.144	399.968	447.186	517.498	587.488	646.631	734.373	806.53	823.582	902.197	950.921	987.589	1063.28	1109.57	1241.11	1357.19	1470.02
		Agriculture and mining				0.476415	0.35219	0.315855	0.312464	0.290567	0.0915881	0.0830416	0.0950885	0.114818	0.132067	0.167257	0.124852	0.11936	0.145238	0.153187	0.200467	0.173858	0.260217	0.235992	0.214467	0.150433
		Utilities				0.431044	0.297231	0.440303	0.576985	0.580396	0.384956	0.401513	0.413602	0.406773	0.366061	0.446286	0.510102	0.511734	0.452693	0.445361	0.421484	0.415393	0.438421	0.48814	0.502665	0.516656
		Construction				0.612663	0.47568	0.575536	0.468455	0.265398	0.207611	0.185544	0.186844	0.17338	0.167994	0.181436	0.198843	0.199725	0.164817	0.168885	0.217598	0.233162	0.238968	0.25508	0.336663	0.418312
		Manufacturing				5.80727	8.29123	11.7638	19.8303	19.7809	21.9788	31.2741	38.8797	48.2085	62.8093	75.5286	93.8539	97.6775	115.658	119.327	109.647	114.363	122.838	140.595	147.817	159.697
			Durable goods			5.45564	7.88134	11.2353	19.2079	19.1865	21.4215	30.61	38.0987	47.3299	61.6807	74.481	92.5309	96.5483	114.605	118.252	108.163	112.815	121.346	138.973	146.251	158.119
				Wood products		0.0555734	0.0450129	0.0501962	0.0409696	0.03133	0.0166837	0.013374	0.0161406	0.0103661	0.022877	0.0241683	0.0255706	0.00784373	0.00882977	0.00910305	0.0179151	0.0163032	0.0180528	0.0118634	0.0106561	0.0174244
				Nonmetallic mineral products		0.1598	0.120485	0.126307	0.100866	0.0868895	0.0311418	0.0207705	0.0195914	0.0200531	0.0194189	0.0199367	0.0350521	0.0314322	0.0324942	0.0246736	0.0755012	0.109821	0.105771	0.122349	0.141314	0.173344
				Primary metals		0.018962	0.0170293	0.0148765	0.0084805	0.0104645	0.00985247	0.00988834	0.015749	0.0175587	0.0298151	0.0181864	0.0480815	0.037659	0.110704	0.170982	0.0887543	0.0757686	0.0692422	0.0638116	0.0692891	0.10159
				Fabricated metal products		0.414449	0.401029	0.437874	0.432006	0.465869	0.348567	0.330404	0.321118	0.314502	0.322358	0.271275	0.286007	0.279974	0.258166	0.237308	0.263884	0.255053	0.257369	0.273908	0.320607	0.330291
				Machinery		0.82639	0.79357	1.01298	1.03804	1.22271	0.632016	0.595944	0.641355	0.725304	0.760604	0.719291	1.24339	1.7646	1.7183	1.77384	0.902217	0.949991	0.998332	1.17829	1.07469	1.10097
				Computer and electronic products		4.25647	6.36957	9.22995	16.4084	16.4176	18.8979	27.4975	34.7905	43.5484	57.1563	69.7493	86.4924	90.2151	107.822	111.471	102.168	106.351	114.945	132.001	139.76	149.727
				Electrical equipment, appliances, and components		2.39367	1.82251	2.55498	2.79231	2.61085	2.28842	2.48037	2.13906	2.38392	3.00426	2.68905	3.43501	3.35572	3.10044	2.66176	2.51784	2.8198	2.62269	3.07061	2.57232	3.74429
				Motor vehicles, bodies and trailers, and parts		1.02595	1.05428	0.913779	0.837775	1.23995	0.739627	0.783618	0.545426	0.571834	0.380067	0.323506	0.338505	0.227122	0.35767	0.322682	0.329262	0.372267	0.383617	0.3704	0.340203	0.409217
				Other transportation equipment		0.203052	0.193921	0.250088	0.166608	0.140944	0.180861	0.253292	0.261149	0.253803	0.26999	0.285751	0.354569	0.485988	0.71649	0.847233	1.14084	1.28431	1.39175	1.31887	1.60291	2.03304
				Furniture and related products		0.0447563	0.039221	0.0473043	0.0460775	0.0400961	0.0423415	0.0497837	0.053137	0.0260576	0.0268778	0.0384945	0.0402238	0.0341457	0.028179	0.025117	0.0412559	0.0444007	0.0388191	0.0253773	0.0315561	0.0362997
				Miscellaneous manufacturing		0.686932	0.697632	0.732985	1.01047	0.282599	0.387822	0.440284	0.510699	0.450078	0.519871	0.567543	0.589493	0.455193	0.568247	0.750543	0.617767	0.537395	0.550591	0.552365	0.577415	0.575055
			Nondurable goods			2.17624	1.72683	1.91466	1.37138	1.23242	0.958855	0.93724	1.04209	1.07543	1.36917	1.10493	1.40996	1.1565	1.04538	1.06518	1.48389	1.54748	1.50147	1.64209	1.60454	1.63496
				Food and beverage and tobacco products		0.535086	0.400255	0.465159	0.30954	0.240577	0.13893	0.161342	0.129228	0.112126	0.115437	0.100543	0.0964574	0.0723289	0.0538958	0.0946292	0.0943117	0.107387	0.0961093	0.0984568	0.143337	0.143002
				Textile mills and textile product mills		0.09548	0.0804533	0.0886956	0.0568501	0.0572801	0.0335427	0.0349127	0.0326017	0.0313452	0.0257598	0.0214617	0.0171314	0.0104911	0.0106946	0.0138155	0.015751	0.0140153	0.01216	0.015795	0.0161862	0.0126615
				Apparel and leather and allied products		0.0377942	0.0351983	0.0482898	0.0470374	0.0448694	0.0282757	0.033459	0.0369144	0.0391696	0.0410893	0.045572	0.0400915	0.0310269	0.0308668	0.0284764	0.032523	0.0292638	0.0248577	0.0241731	0.0194864	0.0148924
				Paper products		0.318202	0.244328	0.206397	0.117215	0.146109	0.0730292	0.0522903	0.0950318	0.0820886	0.0312867	0.0690295	0.136088	0.142042	0.0998297	0.0775686	0.187371	0.26157	0.278689	0.37025	0.276962	0.223697
				Printing and related support activities		0.117601	0.117105	0.197041	0.154587	0.215428	0.256443	0.235378	0.224777	0.246174	0.296192	0.232985	0.267896	0.240443	0.215829	0.215641	0.230682	0.245564	0.22571	0.241242	0.242474	0.237198
				Petroleum and coal products		0.284451	0.166941	0.10742	0.102714	0.0315041	0.00584684	0.00670803	0.0424227	0.0394972	0.0372859	0.039935	0.0447328	0.0430007	0.0433077	0.0380648	0.0399219	0.0406722	0.0434385	0.0405507	0.0312639	0.0309067
				Chemical products		0.754593	0.602771	0.672581	0.462779	0.358927	0.287355	0.307126	0.357259	0.410038	0.621696	0.424266	0.605709	0.522252	0.514023	0.505958	0.749115	0.697514	0.674257	0.709252	0.71191	0.810046
				Plastics and rubber products		0.184983	0.187546	0.237279	0.206177	0.226585	0.194697	0.15669	0.171437	0.146244	0.206543	0.196824	0.211161	0.0973471	0.0770069	0.0924186	0.134211	0.149818	0.142894	0.130779	0.160811	0.177302
		Wholesale trade				17.4691	18.3102	19.7221	20.0584	18.0905	17.3277	17.2834	19.3605	19.486	20.7616	22.8916	23.2263	23.262	24.1184	24.2564	25.7658	26.2356	26.7915	26.4541	26.8999	29.3885
		Retail trade				6.20556	7.39424	7.95326	10.7824	9.54468	11.6992	13.0385	15.8087	19.9567	25.016	29.4639	29.8016	32.5336	38.2023	44.6276	54.7004	59.9488	64.6436	71.4835	78.9062	87.4784
			Motor vehicle and parts dealers			0.00230691	0.00356458	0.00533161	0.00760838	0.00829333	0.00971888	0.00805848	0.00996315	0.0135449	0.0177708	0.0177848	0.0138486	0.0104635	0.00598164	0.00598164	0.00598164	0.00425398	0.00361005	0.00626064	0.00598213	0.00506726
			Food and beverage stores			0	0	0	0	0	0	0	0	0	0	0	0	0	0	0	0	0	0	0	0	0
			General merchandise stores			0.70868	0.802939	0.911876	1.00633	1.01434	1.02883	0.718299	0.567307	0.445886	0.335697	0.230176	0.213583	0.187922	0.163769	0.129815	0.111745	0.104611	0.101977	0.0957919	0.0850337	0.0871018
			Other retail			5.75106	6.86991	7.35922	10.11	8.8627	10.9889	12.5175	15.3639	19.573	24.6885	29.213	29.5747	32.3376	38.0329	44.4996	54.5826	59.8404	64.5394	71.3851	78.8197	87.3929
		Transportation and warehousing				1.40426	1.18158	1.26334	1.58957	1.18371	0.402564	0.362492	0.614521	0.512913	0.485068	0.53861	0.641486	0.73344	0.730328	0.773496	0.832881	0.767683	0.751263	0.764298	0.821949	0.801222
			Air transportation			0.683943	0.56936	0.495348	0.736124	0.608159	0.0814504	0.0814504	0.0814504	0.0781275	0.0809492	0.104944	0.165257	0.177711	0.240719	0.276424	0.353896	0.255565	0.227159	0.143643	0.120587	0.111673
			Rail transportation			0.0944854	0.103584	0.131072	0.0604767	0.0238667	0.0217933	0.0649032	0.047376	0.0759892	0.0913976	0.0909314	0.0951405	0.106867	0.0990809	0.106868	0.125042	0.117291	0.146371	0.112233	0.139523	0.139641
			Water transportation			0.126488	0.0969543	0.0950107	0.051196	0.015666	0.0221698	0.0221698	0.0221698	0.0221698	0.0221698	0.0067865	0.0067074	0.0250934	0.021334	0.00993991	0.0109245	0.0169658	0.0233945	0.0202497	0.0154242	0.00717762
			Truck transportation			0.101448	0.072408	0.0867246	0.112314	0.0840109	0.0709233	0.0532686	0.0811516	0.0973025	0.0692657	0.0742438	0.0879585	0.0905598	0.0749847	0.0728772	0.0626409	0.0603435	0.0798542	0.091779	0.0999999	0.0843946
			Transit and ground passenger transportation			0	0	0	0	0	0	0	0	0	0	0	0	0	0	0	0	0	0	0	0	0
			Pipeline transportation			0.11935	0.0734136	0.102493	0.124793	0.103104	0.0128994	0.0351698	0.0394211	0.0315724	0.02394	0.0209181	0.0146824	0.0302709	0.02947	0.0397637	0.041667	0.036899	0.0258537	0.0296939	0.0232531	0.0236047
			Other transportation and support activities			0.204813	0.194026	0.247276	0.34642	0.228086	0.13352	0.127289	0.261994	0.175716	0.150984	0.17462	0.151058	0.154912	0.114704	0.145539	0.150041	0.190962	0.177988	0.270093	0.298161	0.311766
			Warehousing and storage			0.0318267	0.018102	0.0187246	0.0220788	0.00763735	0.0620382	0.0789152	0.0825949	0.054177	0.0463399	0.0661386	0.120672	0.148019	0.150044	0.122084	0.0886698	0.0896553	0.0706426	0.0966064	0.125002	0.122965
		Information				191.018	211.919	234.503	239.578	257.755	279.558	291.873	331.876	372.561	388.063	430.611	464.71	463.424	493.139	508.497	508.559	566.06	582.359	667.359	741.484	802.232
			Publishing industries, except internet (includes software)			27.6101	33.5285	47.5712	36.4311	36.3777	43.1124	48.4535	60.3212	69.6598	68.683	90.1516	89.6952	91.9889	102.719	112.012	118.809	126.183	133.829	146.443	167.947	179.496
			Motion picture and sound recording industries			2.49993	3.12863	3.82727	3.14013	3.41984	4.33697	4.58237	5.07028	4.99621	5.28892	5.54305	5.78209	6.55845	7.85011	7.87542	8.48055	8.44854	8.91136	9.03204	9.77937	9.57361
			Broadcasting and telecommunications			136.291	147.869	161.329	180.004	187.421	187.557	193.389	213.727	247.233	257.912	290.998	315.3	306.008	311.603	308.741	309.622	343.021	338.307	379.168	402.398	424.442
			Data processing, internet publishing, and other information services			23.4732	26.9818	21.1359	16.9108	28.5907	44.2169	45.2095	53.2854	50.513	55.9087	43.729	53.7513	58.7831	70.9328	79.8486	71.6479	88.5024	101.527	133.117	160.772	187.589
		Finance, insurance, real estate, rental, and leasing				1.95965	1.98988	3.49952	3.5724	3.64392	4.12708	4.4417	4.99944	5.2524	5.45999	5.74049	5.78311	6.07098	6.1422	6.07445	6.13671	6.27704	6.38957	6.60944	7.14215	7.57031
			Finance and insurance			1.61666	1.72755	3.11606	3.25218	3.34565	3.93138	4.25611	4.78745	5.03464	5.22162	5.44888	5.53465	5.83047	5.81636	5.79921	5.88036	6.03407	6.1154	6.33332	6.79791	7.15688
				Federal Reserve banks, credit intermediation, and related activities		0.995831	1.01207	1.52112	1.46246	1.4383	1.95341	2.17475	2.3968	2.45975	2.60959	2.57613	2.62444	2.74688	2.74517	2.75566	2.77962	2.89362	2.88638	2.81858	3.08557	3.2358
				Securities, commodity contracts, and investments		0.208577	0.290277	0.595006	0.755618	0.784921	0.717294	0.618233	0.742086	0.787262	0.846621	0.919088	0.965035	0.981519	0.941675	1.0142	1.01025	1.10877	1.16994	1.25564	1.34496	1.32314
				Insurance carriers and related activities		0.409724	0.42087	0.990874	1.02314	1.11064	1.22931	1.43078	1.59487	1.70954	1.69001	1.87123	1.85893	2.01126	2.03851	1.93156	1.994	2.01526	2.04654	2.24864	2.36738	2.59663
				Funds, trusts, and other financial vehicles		0.00252648	0.00432637	0.00905886	0.0109547	0.0117818	0.031362	0.0323461	0.0536966	0.078086	0.075396	0.0824338	0.0862418	0.0908132	0.0910017	0.0977815	0.0964855	0.0164133	0.0125376	0.0104622	0.0104622	0.0104622
			Real estate and rental and leasing			0.343211	0.26247	0.383625	0.320338	0.298364	0.19571	0.185584	0.211991	0.217763	0.238375	0.291613	0.248458	0.240508	0.32584	0.275241	0.256346	0.242969	0.274178	0.276119	0.344233	0.413432
				Real estate		0.211173	0.144106	0.193607	0.13409	0.153506	0.0897117	0.115641	0.138813	0.0924968	0.160365	0.140532	0.122723	0.117759	0.1834	0.124046	0.0861688	0.104466	0.115964	0.130375	0.193454	0.281647
					Housing	0.0337308	0.0489724	0.051313	0.021774	0.0544821	0.0152684	0.0592345	0.0624122	0.0192576	0.0692112	0.030339	0.0137342	0.0218321	0.0797477	0.0345403	0.0103753	0.0131395	0.0139247	0.0180643	0.0202083	0.0695032
					Other real estate	0.177442	0.0951338	0.142293	0.112316	0.0990237	0.0744433	0.0564064	0.0764012	0.0732392	0.0911542	0.110193	0.108989	0.0959273	0.103653	0.0895057	0.0757935	0.0913263	0.10204	0.112311	0.173246	0.212144
				Rental and leasing services and lessors of intangible assets		0.131984	0.11836	0.190046	0.186322	0.144878	0.106027	0.0699357	0.0731652	0.12527	0.0780092	0.15108	0.125736	0.122749	0.14244	0.151195	0.170178	0.138503	0.158214	0.145744	0.150779	0.131785
		Professional and business services				52.657	64.8437	75.7934	83.1375	87.6027	83.6215	95.134	109.828	122.831	135.833	159.01	172.016	182.606	204.734	228.319	262.665	270.682	286.234	308.834	334.629	363.528
			Professional, scientific, and technical services			50.4899	61.3418	70.3213	76.5453	80.3759	77.4988	88.1172	99.9349	112.554	126.957	146.355	158.92	169.282	191.362	214.1	247.357	253.795	267.727	288.415	312.675	340.979
				Legal services		0.0905071	0.11364	0.158667	0.194869	0.210982	0.219057	0.212809	0.215413	0.230109	0.230691	0.272674	0.276434	0.277351	0.244513	0.239506	0.228718	0.24936	0.234781	0.263519	0.27597	0.325768
				Computer systems design and related services		48.5483	59.3563	66.6651	72.6402	76.2308	73.0119	83.2045	94.5736	107.124	120.858	139.591	152.057	162.016	183.475	205.766	238.426	244.485	257.712	277.275	300.741	328.242
				Miscellaneous professional, scientific, and technical services		1.69026	1.57165	3.52847	3.72446	3.96099	4.41459	4.82788	5.25894	5.25562	5.92903	6.54037	6.60897	7.0086	7.65274	8.09777	8.70244	9.06023	9.77801	10.8665	11.6516	12.4126
			Management of companies and enterprises			0.710477	1.5913	2.91499	3.49939	3.81994	2.6503	3.23115	5.85605	5.83474	4.02516	7.33647	7.61799	8.05413	8.17071	8.38175	9.24828	9.76673	10.5217	11.5706	12.4441	13.1489
			Administrative and waste management services			0.928187	1.50889	2.47792	3.16618	3.55874	3.40449	3.72486	4.2869	4.61824	4.77071	5.44242	5.57142	5.34122	5.22058	5.84265	6.05967	7.11511	7.96986	8.8207	9.48463	9.42885
				Administrative and support services		0.849695	1.45613	2.4174	3.11634	3.5322	3.39522	3.71862	4.27093	4.60661	4.73997	5.40494	5.53142	5.30187	5.19393	5.79447	5.99268	7.04985	7.91334	8.79512	9.45781	9.40903
				Waste management and remediation services		0.0815558	0.054306	0.0620869	0.0508772	0.0267307	0.0089379	0.00576038	0.0156452	0.0111555	0.0306474	0.0374095	0.0399621	0.03932	0.0264985	0.0481336	0.0669916	0.0652958	0.056653	0.0260718	0.0273663	0.0204541
		Educational services, health care, and social assistance				9.43938	9.56709	10.0328	9.76825	9.60909	10.6236	11.0228	11.927	11.456	11.1835	11.4455	11.7716	11.8821	12.2948	11.9612	11.8513	11.6413	12.3705	12.7005	13.6298	13.9447
			Educational services			8.32299	9.12784	9.67415	9.34567	9.59701	9.6819	9.86167	10.4897	9.76946	9.43754	9.44977	9.69783	9.66329	9.96438	9.41113	9.17156	8.6332	9.26689	9.41539	10.0113	10.0544
			Health care and social assistance			1.12985	0.872918	0.871188	0.882192	0.665404	1.24739	1.40597	1.641	1.79384	1.8261	2.03674	2.11242	2.24123	2.35038	2.55314	2.67975	3.01259	3.10539	3.29185	3.6322	3.92303
				Ambulatory health care services		0.241684	0.17398	0.151768	0.105594	0.0553708	0.173761	0.24912	0.311875	0.313111	0.253183	0.395761	0.489394	0.516583	0.553149	0.650884	0.681176	0.740826	0.689367	0.758172	0.874793	0.933398
				Hospitals and nursing and residential care facilities		0.831472	0.653683	0.664231	0.714201	0.556572	1.0178	1.10378	1.27393	1.42463	1.51672	1.59825	1.58307	1.68382	1.75354	1.83588	1.92858	2.19434	2.34687	2.46898	2.68091	2.91258
					Hospitals	0.781743	0.616473	0.629739	0.684443	0.538433	0.995881	1.08391	1.25758	1.40398	1.49871	1.58119	1.56854	1.6734	1.74335	1.82696	1.91568	2.18316	2.33949	2.46561	2.67214	2.89397
					Nursing and residential care facilities	0.0497292	0.0372096	0.0344927	0.0297584	0.0181387	0.0219176	0.0198727	0.0163487	0.0206489	0.0180045	0.0170668	0.0145302	0.0104166	0.0101882	0.00891761	0.0129048	0.0111752	0.00738294	0.00336847	0.00876518	0.0186098
				Social assistance		0.0566913	0.045255	0.0551884	0.0623966	0.0534615	0.0558259	0.053065	0.0551947	0.0560948	0.0561938	0.0427256	0.0399515	0.0408274	0.0436969	0.0663784	0.0699882	0.077424	0.0691511	0.0647023	0.0764975	0.077059
		Arts, entertainment, recreation, accommodation, and food services				0.200058	0.177343	0.214936	0.232048	0.19211	0.132258	0.0748572	0.103254	0.14326	0.207359	0.322681	0.322018	0.323207	0.299156	0.299756	0.256594	0.291257	0.355309	0.400327	0.391676	0.416476
			Arts, entertainment, and recreation			0.0288429	0.0311756	0.0502608	0.0710361	0.0725548	0.0543136	0.0557656	0.0489588	0.0309248	0.0350648	0.0321101	0.0494739	0.0664426	0.055184	0.0728829	0.0432998	0.0672569	0.108154	0.136001	0.114232	0.125745
				Performing arts, spectator sports, museums, and related activities		0.011935	0.0191077	0.0335072	0.0479974	0.0544161	0.0440918	0.0467436	0.0390222	0.0242005	0.0213792	0.018309	0.0209831	0.0244668	0.0276522	0.0326197	0.0311644	0.0578537	0.0757296	0.0952141	0.0847563	0.0807564
				Amusements, gambling, and recreation industries		0.0169079	0.012068	0.0167536	0.0230387	0.0181387	0.0102218	0.00902201	0.00993664	0.00672427	0.0136856	0.0138011	0.0284907	0.0419758	0.0275317	0.0402632	0.0121355	0.00940319	0.0324246	0.0407873	0.0294757	0.0449886
			Accommodation and food services			0.178418	0.153858	0.176935	0.177738	0.13608	0.0902276	0.0322766	0.0641051	0.11492	0.173558	0.28979	0.272144	0.256734	0.243819	0.226867	0.213294	0.22398	0.247108	0.26428	0.277366	0.290649
		Other services, except government				19.9661	18.9235	18.5762	18.3094	15.31	14.0236	11.5397	10.9932	8.55973	7.35034	6.1114	5.99282	5.78019	5.94458	5.76224	6.33443	6.12965	6.04285	5.8771	5.36909	4.95201
	Government					7.81076	8.25154	7.80896	7.42905	8.8541	9.48667	9.82356	10.4651	10.8689	11.4197	11.769	12.2875	12.7172	13.562	13.4141	10.6641	12.4982	12.3555	12.5208	13.0251	13.581
		Federal				4.40805	4.56373	4.1086	3.42832	4.26414	4.61106	4.52562	4.77054	4.95159	5.05776	5.00115	5.219	5.33127	6.14849	6.11404	5.54774	5.25016	5.0197	4.89914	5.1231	5.34568
			General government			4.053	4.18219	3.72234	3.02872	3.89868	4.23548	4.11842	4.27943	4.42825	4.48434	4.41749	4.58521	4.70395	5.49233	5.43351	4.868	4.6132	4.38815	4.28371	4.50705	4.71116
				National defense		1.57111	1.55298	1.39556	1.15727	1.53557	2.15435	2.16675	2.14146	2.08726	2.11187	2.07607	2.11804	2.20001	2.62458	2.59094	2.312	2.17336	2.07918	2.04018	2.18947	2.29796
				Nondefense		2.46374	2.60821	2.30868	1.8578	2.34769	2.08545	1.95868	2.14119	2.34039	2.37182	2.34072	2.46623	2.50328	2.86784	2.8426	2.556	2.43974	2.30906	2.24391	2.31965	2.4158
			Government enterprises			0.355613	0.381428	0.384267	0.395118	0.365215	0.376069	0.406935	0.490494	0.522782	0.573373	0.583868	0.634363	0.62764	0.655604	0.680332	0.679737	0.636954	0.631569	0.615434	0.615758	0.634094
		State and local				3.4942	3.77254	3.75632	4.00301	4.61124	4.90228	5.30894	5.70366	5.92669	6.36774	6.76893	7.06961	7.38625	7.41302	7.29954	5.11639	7.24567	7.33341	7.62176	7.90119	8.23437
Private goods-producing industries						5.93496	8.43507	11.9458	20.0543	19.9696	22.1251	31.4446	39.0767	48.4322	63.0704	75.8363	94.1675	97.9907	115.973	119.654	110.065	114.769	123.341	141.081	148.369	160.261
Private services-producing industries						288.197	323.813	361.905	377.637	397.039	415.642	440.459	501.602	558.701	592.585	665.12	713.673	726.368	785.602	830.861	877.524	948.453	986.348	1100.4	1208.58	1309.44
Note: These estimates are based on data valued in producers’ prices and exclude transportation costs and wholesale and retail trade markups, with the exception of retail trade markups associated with e-commerce transactions.
U.S. Bureau of Economic Analysis

## Sheet: Table 8
Table 8. Digital Economy Current-Dollar Value Added by Industry
Billions of dollars
Industries						1997	1998	1999	2000	2001	2002	2003	2004	2005	2006	2007	2008	2009	2010	2011	2012	2013	2014	2015	2016	2017
All Industries						505.28	540.115	582.772	627.288	605.631	614.927	647.747	705.826	755.874	787.132	849.622	891.119	893.637	944.655	978.322	998.253	1067.6	1096.48	1193.47	1276.97	1351.28
	Private industries					497.296	531.817	574.705	619.388	596.244	605.06	637.675	695.262	744.878	775.528	837.647	878.443	880.779	931.089	964.834	987.589	1055.07	1084.12	1181.04	1264.23	1338.13
		Agriculture and mining				0.47901	0.350206	0.320501	0.325501	0.304364	0.0941092	0.0835753	0.0940924	0.113473	0.131282	0.166654	0.126249	0.120153	0.144211	0.153192	0.200467	0.174079	0.260222	0.235821	0.212721	0.147607
		Utilities				0.433391	0.295556	0.446779	0.601058	0.607955	0.395553	0.404094	0.409269	0.402007	0.363885	0.444678	0.515808	0.515134	0.449492	0.445377	0.421484	0.415922	0.43843	0.487787	0.498574	0.506952
		Construction				0.616	0.473	0.584	0.488	0.278	0.213326	0.186737	0.184887	0.171349	0.166995	0.180782	0.201067	0.201052	0.163651	0.168891	0.217598	0.233458	0.238973	0.254896	0.333923	0.410455
		Manufacturing				134.631	129.646	128.798	157.259	113.05	107.095	120.535	124.137	132.749	141.373	138.06	135.022	124.701	132.816	127.076	109.647	110.204	112.91	122.965	121.798	129.841
			Durable goods			131.74	127.371	126.248	155.411	111.399	105.827	119.329	122.835	131.446	139.762	136.791	133.5	123.446	131.736	125.992	108.163	108.659	111.404	121.338	120.277	128.3
				Wood products		0.0558761	0.0447593	0.0509345	0.0426789	0.0328177	0.0171429	0.01346	0.0159715	0.0102446	0.022741	0.0240812	0.0258566	0.00789586	0.00876733	0.00910339	0.0179151	0.0163239	0.0180531	0.0118548	0.0105694	0.0170972
				Nonmetallic mineral products		0.173	0.129	0.138	0.113138	0.098	0.0344547	0.0225083	0.0208739	0.0213391	0.0207848	0.0213894	0.0374597	0.0333246	0.0333911	0.0253032	0.0755012	0.106978	0.0944018	0.111932	0.130005	0.155826
				Primary metals		0.311266	0.280233	0.245571	0.142572	0.179886	0.158567	0.120023	0.136158	0.126965	0.10349	0.0541757	0.107568	0.134695	0.141936	0.146056	0.0887543	0.0847706	0.089548	0.104544	0.116526	0.148598
				Fabricated metal products		0.541352	0.519852	0.573258	0.568003	0.590624	0.424382	0.38465	0.351921	0.330465	0.328922	0.272423	0.289051	0.283093	0.256748	0.237331	0.263884	0.255441	0.257474	0.274009	0.318524	0.324409
				Machinery		1.35859	1.25478	1.55392	1.52152	1.6675	0.837247	0.756198	0.772772	0.832765	0.837378	0.780999	1.31009	1.86923	1.76824	1.77315	0.902217	0.960922	1.02128	1.16304	0.990963	1.0087
				Computer and electronic products		122.497	118.74	116.73	145.904	101.919	99.2316	112.853	117.354	126.044	134.241	131.708	127.047	116.35	124.906	119.229	102.168	102.295	105.24	114.602	114.078	120.902
				Electrical equipment, appliances, and components		3.31526	2.8093	3.50488	3.69738	3.75458	2.75736	2.66991	2.1716	2.24276	2.62421	2.3877	3.06154	3.25137	2.77929	2.51176	2.51784	2.79726	2.59271	3.21001	2.73557	3.54861
				Motor vehicles, bodies and trailers, and parts		2.0881	2.1684	1.85747	1.64999	2.4287	1.42168	1.40184	0.862264	0.81934	0.49926	0.402527	0.408585	0.266614	0.368684	0.325208	0.329262	0.373259	0.384205	0.371227	0.338609	0.402731
				Other transportation equipment		0.414399	0.391641	0.512845	0.34702	0.295204	0.370585	0.482994	0.474705	0.458378	0.481153	0.503819	0.572987	0.693321	0.855974	0.961781	1.14084	1.19057	1.11904	0.904844	0.945129	1.18547
				Furniture and related products		0.045	0.039	0.048	0.048	0.042	0.0435071	0.0501037	0.0525804	0.0257524	0.0267179	0.0383559	0.0406737	0.0343726	0.0279797	0.0251179	0.0412559	0.0444571	0.0388199	0.0253589	0.0312993	0.0356179
				Miscellaneous manufacturing		0.940161	0.994341	1.03331	1.37689	0.390198	0.530319	0.574513	0.622217	0.534451	0.576706	0.598	0.599571	0.521866	0.588927	0.747513	0.617767	0.533705	0.54841	0.558818	0.58227	0.570101
			Nondurable goods			2.89029	2.27508	2.5507	1.84787	1.65088	1.26842	1.20559	1.30139	1.30237	1.61069	1.26849	1.52196	1.2548	1.08	1.08457	1.48389	1.5452	1.50579	1.62689	1.52029	1.54172
				Food and beverage and tobacco products		0.538	0.398	0.472	0.322455	0.252	0.142755	0.162379	0.127874	0.110813	0.11475	0.100181	0.0975363	0.0728096	0.0535147	0.0946328	0.0943117	0.107524	0.0961113	0.0983856	0.142171	0.140316
				Textile mills and textile product mills		0.096	0.08	0.09	0.0592221	0.06	0.034466	0.0351371	0.0322602	0.030978	0.0256066	0.0213844	0.017323	0.0105608	0.010619	0.013816	0.015751	0.0140332	0.0121602	0.0157836	0.0160545	0.0124237
				Apparel and leather and allied products		0.038	0.035	0.049	0.049	0.047	0.0290541	0.033674	0.0365277	0.0387108	0.040845	0.0454078	0.04054	0.0312331	0.0306485	0.0284775	0.032523	0.029301	0.0248582	0.0241556	0.0193278	0.0146127
				Paper products		0.366441	0.278337	0.23909	0.136721	0.17084	0.0839078	0.0586735	0.104718	0.0897637	0.0342393	0.0755985	0.143665	0.155897	0.104178	0.0781577	0.187371	0.270594	0.308214	0.406739	0.289288	0.25481
				Printing and related support activities		0.143323	0.140467	0.237444	0.188077	0.244725	0.288708	0.26069	0.242861	0.259611	0.306325	0.237491	0.270593	0.244315	0.215386	0.215824	0.230682	0.246327	0.227505	0.242132	0.237829	0.230643
				Petroleum and coal products		0.286	0.166	0.109	0.107	0.033	0.00600778	0.00675114	0.0419783	0.0390345	0.0370642	0.0397912	0.0452331	0.0432864	0.0430014	0.0380662	0.0399219	0.0407239	0.0434394	0.0405213	0.0310095	0.0303262
				Chemical products		1.20961	0.956311	1.0788	0.74858	0.583168	0.458958	0.476345	0.533537	0.58699	0.844728	0.550576	0.696614	0.598014	0.545921	0.523021	0.749115	0.687974	0.652261	0.668847	0.62435	0.685022
				Plastics and rubber products		0.21292	0.220961	0.275365	0.236814	0.260149	0.224563	0.171941	0.181629	0.146468	0.207127	0.198059	0.21046	0.0986848	0.076728	0.0925732	0.134211	0.14872	0.141243	0.130324	0.160261	0.173568
		Wholesale trade				13.7294	14.5193	16.0482	16.8459	15.5181	14.8918	14.7795	16.4946	16.8618	18.4146	20.7364	21.7596	22.2807	23.1974	23.8925	25.7658	26.5421	27.3655	27.2597	27.9505	30.7079
		Retail trade				5.48216	6.69071	7.29586	9.95515	8.95288	11.0752	12.4646	15.365	19.7972	25.2505	29.8501	31.0702	34.7507	39.9216	45.5521	54.7004	60.2068	64.5717	72.9649	81.0053	89.1715
			Motor vehicle and parts dealers			0.0057395	0.00877082	0.013387	0.0196124	0.0214962	0.0247113	0.0200688	0.0243954	0.0331241	0.0437122	0.0438497	0.0346514	0.0260638	0.0146968	0	0.00598164	0.00425939	0.00361013	0.00625611	0.00593344	0.00497209
			Food and beverage stores			0.00246533	0.00376739	0.00575022	-0.00470204	0.0092334	0.0106144	0.00469145	0.00912272	0.0104288	0.0126618	0.00763429	0.00538804	0	0	0	0	0	0	0	0.00279192	0.00299341
			General merchandise stores			0.311887	0.363886	0.436272	0.503683	0.544408	0.575521	0.422258	0.357852	0.301081	0.240189	0.17392	0.171714	0.157366	0.142966	0.119625	0.111745	0.111047	0.112574	0.111111	0.102941	0.113864
			Other retail			5.16207	6.31429	6.84045	9.43656	8.37774	10.4643	12.0175	14.9736	19.4525	24.954	29.6247	30.8584	34.5673	39.764	45.4325	54.5826	60.0915	64.4555	72.8475	80.8936	89.0497
		Transportation and warehousing				1.412	1.175	1.282	1.656	1.24	0.413672	0.364846	0.608123	0.506938	0.482216	0.536704	0.648705	0.738364	0.725213	0.773575	0.832881	0.768659	0.751279	0.763745	0.81526	0.786173
			Air transportation			0.747	0.615	0.546	0.833	0.692	0.0909135	0	0.0805972	0.0772123	0.0804678	0.104566	0.167105	0.178892	0.239017	0.276434	0.353896	0.255891	0.227163	0.143539	0.119606	0.109575
			Rail transportation			0.095	0.103	0.133	0.063	0.025	0.0223932	0.0653203	0.0468798	0.0750991	0.0908541	0.0906038	0.0962047	0.107577	0.0983803	0.106872	0.125042	0.117441	0.146375	0.112152	0.138387	0.137018
			Water transportation			0.062	0.047	0.047	0.026	0.008	0.0111056	0	0.0202654	0	0.022038	0.00676205	0.00678242	0.0252601	0.0211831	0.00994028	0.0109245	0.0169874	0.0233949	0.0202351	0.0152987	0.00704281
			Truck transportation			0.102	0.072	0.088	0.117	0.088	0.0728756	0.053611	0.0803015	0.0961626	0.0688538	0.0739763	0.0889424	0.0911617	0.0744545	0.0728799	0.0626409	0.0604203	0.0798559	0.0917126	0.0991861	0.0828095
			Transit and ground passenger transportation			0.048	0.054	0.094	0.103	0.072	0.0021407	0.00294435	0	--	--	--	--	--	--	--	--	--	--	--	--	--
			Pipeline transportation			0.12	0.073	0.104	0.13	0.108	0.0132545	0.0353959	0.0390081	0.0312025	0.0237976	0.0208428	0.0148466	0.030472	0.0292616	0.0397652	0.041667	0.0369459	0.0258542	0.0296724	0.0230639	0.0231613
			Other transportation and support activities			0.206	0.193	0.251	0.361	0.239	0.137243	0.128152	0.259341	0.173719	0.15014	0.174053	0.152802	0.155999	0.113934	0.145594	0.150041	0.191205	0.177992	0.269897	0.295734	0.30591
			Warehousing and storage			0.032	0.018	0.019	0.023	0.008	0.0637459	0.0794224	0.0817297	0.0535423	0.0460644	0.0659003	0.122022	0.149003	0.148983	0.122089	0.0886698	0.0897693	0.0706441	0.0965365	0.123984	0.120655
		Information				254.74	279.323	302.279	301.932	320.741	344.142	354.803	392.443	418.495	420.751	455.902	482.162	480.904	501.331	511.308	508.559	563.918	572.266	631.271	686.064	720.263
			Publishing industries, except internet (includes software)			31.6101	38.6905	55.0626	43.593	44.5172	52.2263	55.6562	64.7209	73.2605	71.6985	92.0296	92.7961	95.0414	103.254	112.774	118.809	126.669	133.835	144.715	166.994	177.904
			Motion picture and sound recording industries			3.06707	3.66643	4.53928	3.80687	4.12904	5.18598	5.12625	5.58029	5.37662	5.6128	5.92065	6.01007	6.83988	8.06764	7.97124	8.48055	8.32808	8.77897	8.97074	9.76878	9.60381
			Broadcasting and telecommunications			195.748	208.263	219.893	236.171	240.285	237.056	243.665	264.332	285.596	283.817	313.26	328.705	318.152	317.486	309.972	309.622	342.092	331.488	349.987	358.511	359.581
			Data processing, internet publishing, and other information services			24.315	28.7025	22.7838	18.3608	31.8099	49.6738	50.356	57.8102	54.2618	59.6224	44.692	54.6513	60.8713	72.524	80.5913	71.6479	86.8295	98.165	127.597	150.79	173.175
		Finance, insurance, real estate, rental, and leasing				1.9702	1.97856	3.55081	3.72129	3.81682	4.24058	4.47017	4.94702	5.19085	5.42752	5.71981	5.84779	6.11132	6.09877	6.07467	6.13671	6.28502	6.38971	6.60465	7.08402	7.42813
			Finance and insurance			1.62546	1.71781	3.16189	3.38787	3.50451	4.0396	4.28347	4.7373	4.97566	5.19057	5.42925	5.59656	5.86922	5.77523	5.79942	5.88036	6.04174	6.11552	6.32874	6.74259	7.02246
				Federal Reserve banks, credit intermediation, and related activities		1.00125	1.00637	1.54349	1.52348	1.5066	2.00718	2.18873	2.37169	2.43093	2.59408	2.56685	2.6538	2.76513	2.72576	2.75576	2.77962	2.8973	2.88644	2.81654	3.06046	3.17502
				Securities, commodity contracts, and investments		0.209713	0.288641	0.603756	0.787145	0.822192	0.737039	0.622207	0.734313	0.77804	0.841586	0.915776	0.975829	0.988042	0.935016	1.01424	1.01025	1.11018	1.16997	1.25473	1.33402	1.29829
				Insurance carriers and related activities		0.411956	0.418499	1.00545	1.06583	1.16338	1.26315	1.43998	1.57816	1.68952	1.67996	1.86449	1.87973	2.02462	2.0241	1.93163	1.994	2.01782	2.04658	2.24701	2.34812	2.54786
				Funds, trusts, and other financial vehicles		0.00254024	0.00430199	0.00919209	0.0114118	0.0123412	0.0322253	0.032554	0.0531341	0.0771713	0.0749476	0.0821368	0.0872064	0.0914167	0.0903582	0.0977851	0.0964855	0.0164342	0.0125378	0.0104546	0	0.00128098
			Real estate and rental and leasing			0.344735	0.260747	0.388925	0.33342	0.312304	0.200982	0.186704	0.209723	0.215193	0.236954	0.290562	0.251238	0.242107	0.323536	0.275251	0.256346	0.243278	0.274184	0.27592	0.341431	0.405667
				Real estate		0.212323	0.143294	0.196454	0.139685	0.160795	0.0921812	0.116384	0.137359	0.0914132	0.159412	0.140026	0.124096	0.118542	0.182103	0.124051	0.0861688	0.104599	0.115967	0.130281	0.19188	0.276357
					Housing	0.0339145	0.0486965	0.0520677	0.0226825	0.0570691	0.0156887	0.0596152	0.0617584	0.019032	0.0687997	0.0302297	0.0138878	0.0219772	0.0791838	0.0345416	0.0103753	0.0131562	0.013925	0.0180512	0.0200438	0.0681978
					Other real estate	0.178408	0.0945978	0.144386	0.117003	0.103726	0.0764925	0.056769	0.0756008	0.0723812	0.0906122	0.109796	0.110208	0.0965648	0.10292	0.089509	0.0757935	0.0914425	0.102042	0.112229	0.171836	0.208159
				Rental and leasing services and lessors of intangible assets		0.132412	0.117453	0.192471	0.193735	0.15151	0.108801	0.07032	0.0723638	0.123779	0.0775426	0.150536	0.127142	0.123565	0.141433	0.151201	0.170178	0.138679	0.158217	0.145639	0.149551	0.129309
		Professional and business services				69.3463	82.7344	98.4318	110.375	116.355	106.507	114.194	124.215	135.394	148.262	171.157	185.329	194.076	208.998	231.997	262.665	267.805	279.381	298.077	317.592	337.702
			Professional, scientific, and technical services			67.649	79.5914	92.8698	103.32	108.505	100.178	107.09	114.077	124.965	139.423	158.326	171.901	180.517	195.657	217.741	247.357	250.931	260.95	277.798	295.962	315.683
				Legal services		0.091	0.113	0.161	0.203	0.221	0.225087	0.214177	0.213156	0.227413	0.229319	0.271691	0.279526	0.279195	0.242784	0.239515	0.228718	0.249678	0.234786	0.263328	0.273724	0.319649
				Computer systems design and related services		65.7855	77.8572	89.0035	99.1143	104	95.2642	101.857	108.526	119.432	133.193	151.432	164.851	173.09	187.759	209.361	238.426	241.666	251.038	266.795	284.321	303.415
				Miscellaneous professional, scientific, and technical services		1.77248	1.62121	3.70526	4.00253	4.28447	4.68891	5.01875	5.33828	5.30544	6.00067	6.6225	6.77059	7.1487	7.65558	8.14096	8.70244	9.01541	9.67686	10.7398	11.368	11.9478
			Management of companies and enterprises			0.714346	1.58234	2.95786	3.6454	4.00133	2.72325	3.25192	5.79471	5.76638	4.00122	7.31003	7.7032	8.10766	8.11294	8.38206	9.24828	9.77916	10.5219	11.5622	12.3428	12.9019
			Administrative and waste management services			0.982953	1.56061	2.60418	3.41025	3.84841	3.60557	3.85165	4.34335	4.66204	4.83767	5.52069	5.72472	5.45135	5.2283	5.87369	6.05967	7.09455	7.9095	8.7173	9.28657	9.11721
				Administrative and support services		0.900953	1.50661	2.54118	3.35725	3.82041	3.59639	3.84585	4.32786	4.65102	4.8072	5.48342	5.68431	5.41177	5.20198	5.82556	5.99268	7.02917	7.85284	8.69124	9.25943	9.09714
				Waste management and remediation services		0.082	0.054	0.063	0.053	0.028	0.00918393	0.0057974	0.0154813	0.0110249	0.0304651	0.0372748	0.0404091	0.0395813	0.0263112	0.0481354	0.0669916	0.0653788	0.0566542	0.0260529	0.0271436	0.02007
		Educational services, health care, and social assistance				4.2881	4.61549	5.35091	5.59698	5.98548	7.01648	7.71127	8.75611	8.91869	9.15643	9.76731	10.4089	10.9041	11.483	11.5916	11.8513	11.8742	12.7454	13.2563	14.3477	14.8749
			Educational services			3.1521	3.74749	4.46691	4.67798	5.28848	5.73476	6.29626	7.1323	7.14587	7.3412	7.73791	8.27283	8.64802	9.14922	9.03839	9.17156	8.85779	9.63999	9.96683	10.7451	11.0255
			Health care and social assistance			1.136	0.868	0.884	0.919	0.697	1.28172	1.415	1.62381	1.77282	1.81524	2.0294	2.13605	2.25612	2.33376	2.55323	2.67975	3.01642	3.10546	3.28947	3.60264	3.84935
				Ambulatory health care services		0.243	0.173	0.154	0.11	0.058	0.178544	0.250722	0.308608	0.309443	0.251678	0.394335	0.494868	0.520016	0.549237	0.650908	0.681176	0.741769	0.689381	0.757623	0.867674	0.915867
				Hospitals and nursing and residential care facilities		0.836	0.65	0.674	0.744	0.583	1.04582	1.11088	1.26058	1.40794	1.5077	1.59249	1.60078	1.69501	1.74114	1.83594	1.92858	2.19713	2.34692	2.46719	2.65909	2.85787
					Hospitals	0.786	0.613	0.639	0.713	0.564	1.02329	1.09088	1.24441	1.38753	1.4898	1.57549	1.58609	1.68452	1.73102	1.82703	1.91568	2.18594	2.33954	2.46382	2.6504	2.83961
					Nursing and residential care facilities	0.05	0.037	0.035	0.031	0.019	0.0225209	0.0200004	0.0161775	0.0204071	0.0178974	0.0170053	0.0146928	0.0104858	0.0101162	0.00891794	0.0129048	0.0111894	0.00738309	0.00336603	0.00869385	0.0182602
				Social assistance		0.057	0.045	0.056	0.065	0.056	0.0573626	0.0534061	0.0546165	0.0554377	0.0558597	0.0425717	0.0403984	0.0410987	0.0433879	0.0663808	0.0699882	0.0775225	0.0691526	0.0646555	0.0758749	0.0756116
		Arts, entertainment, recreation, accommodation, and food services				0.258741	0.234468	0.281861	0.302969	0.253926	0.174414	0.101405	0.139663	0.190423	0.254681	0.327092	0.331366	0.331218	0.301127	0.299637	0.256594	0.291111	0.3554	0.400067	0.389274	0.407781
			Arts, entertainment, and recreation			0.029	0.031	0.051	0.074	0.076	0.0558087	0.056124	0.048446	0.0305625	0.0348563	0.0319944	0.0500273	0.0668841	0.0547937	0.0728856	0.0432998	0.0673425	0.108156	0.135903	0.113302	0.123383
				Performing arts, spectator sports, museums, and related activities		0.012	0.019	0.034	0.05	0.057	0.0453055	0.047044	0.0386134	0.023917	0.0212521	0.018243	0.0212179	0.0246294	0.0274567	0.0326209	0.0311644	0.0579273	0.0757312	0.0951452	0.0840665	0.0792397
				Amusements, gambling, and recreation industries		0.017	0.012	0.017	0.024	0.019	0.0105032	0.00908	0.00983255	0.0066455	0.0136042	0.0137514	0.0288094	0.0422548	0.0273371	0.0402647	0.0121355	0.00941515	0.0324252	0.0407578	0.0292358	0.0441436
			Accommodation and food services			0.229741	0.203468	0.230861	0.228969	0.177926	0.118606	0.0452808	0.0912173	0.159861	0.219825	0.295098	0.281338	0.264334	0.246333	0.226752	0.213294	0.223768	0.247244	0.264164	0.275972	0.284397
		Other services, except government				9.90982	9.78151	10.0346	10.329	9.13977	8.8008	7.57685	7.46759	6.08777	5.49367	4.79893	5.0204	5.14444	5.45896	5.50085	6.33443	6.35313	6.44805	6.50032	6.14207	5.87836
	Government					7.98405	8.29834	8.06733	7.89985	9.3874	9.86689	10.0722	10.5647	10.9956	11.6039	11.9754	12.6762	12.8581	13.5664	13.4882	10.6641	12.5319	12.3562	12.4284	12.7328	13.1516
		Federal				4.16359	4.27836	3.97907	3.43355	4.2493	4.5842	4.4903	4.68555	4.91973	5.06297	5.028	5.31429	5.39325	6.15784	6.14276	5.54774	5.25376	5.02858	4.93799	5.13775	5.30608
			General government			3.811	3.904	3.593	3.025	3.869	4.2	4.083	4.203	4.406	4.496	4.449	4.676	4.765	5.51	5.465	4.868	4.616	4.397	4.323	4.527	4.68389
				National defense		1.458	1.422	1.31	1.126	1.487	2.09	2.106	2.062	2.05	2.101	2.079	2.159	2.208	2.615	2.598	2.312	2.161	2.061	2.021	2.148	2.22244
				Nondefense		2.353	2.482	2.283	1.899	2.382	2.11	1.977	2.141	2.356	2.395	2.37	2.517	2.557	2.895	2.867	2.556	2.455	2.336	2.302	2.379	2.46145
			Government enterprises			0.352588	0.374357	0.386067	0.40855	0.380305	0.3842	0.407298	0.482548	0.513727	0.566974	0.579	0.638291	0.628254	0.647841	0.677757	0.679737	0.637764	0.631582	0.614989	0.610746	0.622184
		State and local				3.82046	4.01998	4.08826	4.4663	5.13809	5.28269	5.58185	5.8791	6.07592	6.54097	6.94744	7.36186	7.46483	7.40861	7.34548	5.11639	7.27814	7.32764	7.49038	7.59509	7.84555
Private goods-producing industries						135.726	130.469	129.703	158.073	113.632	107.403	120.805	124.416	133.034	141.671	138.407	135.349	125.022	133.124	127.398	110.065	110.612	113.409	123.456	122.344	130.399
Private services-producing industries						361.57	401.347	445.002	461.316	482.611	497.657	516.87	570.846	611.845	633.857	699.24	743.094	755.757	797.965	837.436	877.524	944.46	970.713	1057.59	1141.89	1207.73
Note: These estimates are based on data valued in producers’ prices and exclude transportation costs and wholesale and retail trade markups, with the exception of retail trade markups associated with e-commerce transactions.
U.S. Bureau of Economic Analysis

## Sheet: Table 9
Table 9. Digital Economy Value-Added Price Indexes by Industry
2012=100
Industries						1997	1998	1999	2000	2001	2002	2003	2004	2005	2006	2007	2008	2009	2010	2011	2012	2013	2014	2015	2016	2017
All Industries						223.556	200.081	183.104	169.032	156.758	150.449	141.917	133.8	126.383	119.653	113.88	108.834	106.861	103.159	101.452	100	99.2395	97.7321	95.2048	93.2004	91.0885
	Private industries					226.14	202.095	184.633	170.196	157.676	151.277	142.597	134.35	126.79	119.933	114.063	108.916	106.945	103.202	101.463	100	99.2278	97.7062	95.16	93.1508	91.0278
		Agriculture and mining				100.545	99.4366	101.471	104.172	104.748	102.753	100.643	98.9524	98.8285	99.4054	99.6397	101.119	100.665	99.2929	100.004	100	100.127	100.002	99.9277	99.1862	98.1218
		Utilities				100.545	99.4366	101.471	104.172	104.748	102.753	100.643	98.9524	98.8285	99.4054	99.6397	101.119	100.665	99.2929	100.004	100	100.127	100.002	99.9277	99.1862	98.1218
		Construction				100.545	99.4366	101.471	104.172	104.748	102.753	100.643	98.9524	98.8285	99.4054	99.6397	101.119	100.665	99.2929	100.004	100	100.127	100.002	99.9277	99.1862	98.1218
		Manufacturing				2318.31	1563.65	1094.87	793.027	571.51	487.266	385.414	319.284	275.364	225.083	182.791	143.864	127.666	114.835	106.494	100	96.3638	91.918	87.4601	82.3976	81.3048
			Durable goods			2414.75	1563.65	1094.87	793.027	571.51	487.266	385.414	319.284	275.364	225.083	182.791	143.864	127.666	114.835	106.494	100	96.3638	91.918	87.4601	82.3976	81.3048
				Wood products		100.545	99.4366	101.471	104.172	104.748	102.753	100.643	98.9524	98.8285	99.4054	99.6397	101.119	100.665	99.2929	100.004	100	100.127	100.002	99.9277	99.1862	98.1218
				Nonmetallic mineral products		108.261	107.068	109.258	112.167	112.787	110.638	108.366	106.546	106.413	107.034	107.286	106.869	106.02	102.76	102.552	100	97.4117	89.2508	91.4856	91.9971	89.8941
				Primary metals		1641.53	1645.59	1650.73	1681.18	1719.01	1609.41	1213.78	864.549	723.086	347.107	297.892	223.72	357.671	128.213	85.4224	100	111.881	129.326	163.832	168.173	146.273
				Fabricated metal products		130.62	129.63	130.919	131.48	126.779	121.751	116.418	109.592	105.075	102.036	100.423	101.064	101.114	99.4508	100.01	100	100.152	100.041	100.037	99.3506	98.2191
				Machinery		164.401	158.118	153.401	146.576	136.378	132.472	126.891	120.491	114.816	110.094	108.579	105.364	105.93	102.906	99.9615	100	101.151	102.299	98.7063	92.2093	91.6194
				Computer and electronic products		2877.91	1864.17	1264.68	889.202	620.793	525.093	410.412	337.317	289.434	234.867	188.83	146.888	128.97	115.845	106.96	100	96.1867	91.5574	86.8195	81.6242	80.7485
				Electrical equipment, appliances, and components		138.501	154.145	137.178	132.413	143.807	120.492	107.642	101.522	94.0785	87.3497	88.7935	89.1276	96.8903	89.6417	94.3646	100	99.2005	98.8569	104.54	106.346	94.7738
				Motor vehicles, bodies and trailers, and parts		203.527	205.676	203.273	196.949	195.871	192.216	178.893	158.09	143.283	131.361	124.427	120.703	117.388	103.079	100.783	100	100.266	100.153	100.223	99.5314	98.415
				Other transportation equipment		204.085	201.959	205.066	208.286	209.448	204.9	190.687	181.775	180.604	178.212	176.314	161.601	142.662	119.468	113.52	100	92.7013	80.4053	68.6077	58.9634	58.3105
				Furniture and related products		100.545	99.4366	101.471	104.172	104.748	102.753	100.643	98.9524	98.8285	99.4054	99.6397	101.119	100.665	99.2929	100.004	100	100.127	100.002	99.9277	99.1862	98.1218
				Miscellaneous manufacturing		136.864	142.531	140.973	136.262	138.075	136.743	130.487	121.836	118.746	110.933	105.367	101.71	114.647	103.639	99.5963	100	99.3134	99.6038	101.168	100.841	99.1386
			Nondurable goods			132.811	131.748	133.22	134.745	133.955	132.285	128.632	124.882	121.103	117.64	114.802	107.944	108.5	103.311	101.82	100	99.8525	100.288	99.0741	94.7493	94.2971
				Food and beverage and tobacco products		100.545	99.4366	101.471	104.172	104.748	102.753	100.643	98.9524	98.8285	99.4054	99.6397	101.119	100.665	99.2929	100.004	100	100.127	100.002	99.9277	99.1862	98.1218
				Textile mills and textile product mills		100.545	99.4366	101.471	104.172	104.748	102.753	100.643	98.9524	98.8285	99.4054	99.6397	101.119	100.665	99.2929	100.004	100	100.127	100.002	99.9277	99.1862	98.1218
				Apparel and leather and allied products		100.545	99.4366	101.471	104.172	104.748	102.753	100.643	98.9524	98.8285	99.4054	99.6397	101.119	100.665	99.2929	100.004	100	100.127	100.002	99.9277	99.1862	98.1218
				Paper products		115.16	113.92	115.84	116.642	116.927	114.896	112.207	110.193	109.35	109.437	109.516	105.568	109.754	104.356	100.759	100	103.45	110.594	109.855	104.45	113.908
				Printing and related support activities		121.872	119.95	120.505	121.664	113.599	112.582	110.754	108.045	105.459	103.421	101.934	101.007	101.61	99.7944	100.085	100	100.311	100.795	100.369	98.0845	97.2364
				Petroleum and coal products		100.545	99.4366	101.471	104.172	104.748	102.753	100.643	98.9524	98.8285	99.4054	99.6397	101.119	100.665	99.2929	100.004	100	100.127	100.002	99.9277	99.1862	98.1218
				Chemical products		160.3	158.652	160.397	161.757	162.476	159.718	155.098	149.342	143.155	135.875	129.771	115.008	114.507	106.205	103.372	100	98.6323	96.7377	94.3032	87.7007	84.5657
				Plastics and rubber products		115.102	117.817	116.051	114.859	114.813	115.34	109.733	105.945	100.154	100.283	100.627	99.6681	101.374	99.6378	100.167	100	99.267	98.8445	99.6524	99.6581	97.8941
		Wholesale trade				78.5924	79.2961	81.3718	83.9842	85.7803	85.9418	85.5124	85.1973	86.5327	88.6953	90.5852	93.6851	95.7814	96.1814	98.4999	100	101.168	102.142	103.045	103.905	104.49
		Retail trade				88.3427	90.4855	91.7341	92.328	93.7997	94.6659	95.5983	97.1928	99.2007	100.937	101.311	104.257	106.815	104.501	102.072	100	100.43	99.8888	102.072	102.66	101.935
			Motor vehicle and parts dealers			101.261	100.145	102.193	104.914	105.494	103.484	101.359	99.6571	99.5324	100.113	100.349	101.839	101.381	100	100	100	100.127	100.002	99.9277	99.1862	98.1218
			Food and beverage stores			0	0	0	0	0	0	0	0	0	0	0	0	0	0	0	0	0	0	0	0	0
			General merchandise stores			44.0096	45.3192	47.8434	50.0513	53.6712	55.9396	58.7858	63.0791	67.5242	71.5494	75.5594	80.3972	83.7398	87.2973	92.1504	100	106.153	110.391	115.992	121.059	130.725
			Other retail			89.7586	91.9123	92.9507	93.3385	94.528	95.2267	96.0063	97.4594	99.3843	101.075	101.41	104.341	106.895	104.552	102.096	100	100.42	99.87	102.049	102.631	101.896
		Transportation and warehousing				100.544	99.4365	101.471	104.172	104.748	102.753	100.643	98.9524	98.8286	99.4054	99.6398	101.119	100.665	99.2931	100.004	100	100.127	100.002	99.9277	99.1862	98.1218
			Air transportation			96.826	95.759	97.7178	100.32	100.874	98.9524	98.9524	98.9524	98.8285	99.4054	99.6397	101.119	100.665	99.2929	100.004	100	100.127	100.002	99.9277	99.1862	98.1218
			Rail transportation			100.545	99.4366	101.471	104.172	104.748	102.753	100.643	98.9524	98.8285	99.4054	99.6397	101.119	100.665	99.2929	100.004	100	100.127	100.002	99.9277	99.1862	98.1218
			Water transportation			97.2692	96.1973	98.1651	100.779	101.336	99.4054	99.4054	99.4054	99.4054	99.4054	99.6397	101.119	100.665	99.2929	100.004	100	100.127	100.002	99.9277	99.1862	98.1218
			Truck transportation			100.545	99.4366	101.471	104.172	104.748	102.753	100.643	98.9524	98.8285	99.4054	99.6397	101.119	100.665	99.2929	100.004	100	100.127	100.002	99.9277	99.1862	98.1218
			Transit and ground passenger transportation			0	0	0	0	0	0	0	0	0	0	0	0	0	0	0	0	0	0	0	0	0
			Pipeline transportation			100.545	99.4366	101.471	104.172	104.748	102.753	100.643	98.9524	98.8285	99.4054	99.6397	101.119	100.665	99.2929	100.004	100	100.127	100.002	99.9277	99.1862	98.1218
			Other transportation and support activities			100.545	99.4369	101.471	104.173	104.749	102.753	100.643	98.9529	98.8291	99.4061	99.6404	101.12	100.666	99.2943	100.004	100	100.127	100.002	99.9277	99.1862	98.1218
			Warehousing and storage			100.545	99.4366	101.471	104.172	104.748	102.753	100.643	98.9524	98.8285	99.4054	99.6397	101.119	100.665	99.2929	100.004	100	100.127	100.002	99.9277	99.1862	98.1218
		Information				133.358	131.806	128.901	126.026	124.436	123.102	121.56	118.249	112.329	108.423	105.873	103.755	103.772	101.661	100.552	100	99.6216	98.267	94.5924	92.5258	89.7824
			Publishing industries, except internet (includes software)			114.487	115.396	115.748	119.659	122.375	121.14	114.865	107.294	105.169	104.391	102.083	103.457	103.318	100.521	100.681	100	100.385	100.005	98.82	99.4326	99.113
			Motion picture and sound recording industries			122.652	117.157	118.571	121.2	120.705	119.543	111.838	110.029	107.584	106.094	106.783	103.914	104.262	102.743	101.189	100	98.5742	98.5143	99.3213	99.8917	100.315
			Broadcasting and telecommunications			143.625	140.843	136.301	131.203	128.206	126.392	125.997	123.677	115.517	110.044	107.65	104.251	103.968	101.888	100.399	100	99.729	97.9843	92.3041	89.0936	84.7184
			Data processing, internet publishing, and other information services			103.586	106.377	107.796	108.574	111.26	112.341	111.384	108.492	107.421	106.642	102.202	101.674	103.553	102.243	100.93	100	98.1097	96.6886	95.8535	93.7911	92.3159
		Finance, insurance, real estate, rental, and leasing				100.538	99.4312	101.466	104.168	104.745	102.75	100.641	98.9515	98.8282	99.4053	99.6397	101.119	100.665	99.2929	100.004	100	100.127	100.002	99.9277	99.1862	98.1218
			Finance and insurance			100.545	99.4366	101.471	104.172	104.748	102.753	100.643	98.9524	98.8285	99.4054	99.6397	101.119	100.665	99.2929	100.004	100	100.127	100.002	99.9277	99.1862	98.1218
				Federal Reserve banks, credit intermediation, and related activities		100.545	99.4366	101.471	104.172	104.748	102.753	100.643	98.9524	98.8285	99.4054	99.6397	101.119	100.665	99.2929	100.004	100	100.127	100.002	99.9277	99.1862	98.1218
				Securities, commodity contracts, and investments		100.545	99.4366	101.471	104.172	104.748	102.753	100.643	98.9524	98.8285	99.4054	99.6397	101.119	100.665	99.2929	100.004	100	100.127	100.002	99.9277	99.1862	98.1218
				Insurance carriers and related activities		100.545	99.4366	101.471	104.172	104.748	102.753	100.643	98.9524	98.8285	99.4054	99.6397	101.119	100.665	99.2929	100.004	100	100.127	100.002	99.9277	99.1862	98.1218
				Funds, trusts, and other financial vehicles		100.545	99.4366	101.471	104.172	104.748	102.753	100.643	98.9524	98.8285	99.4054	99.6397	101.119	100.665	99.2929	100.004	100	100.127	100.002	99.9277	99.9277	99.9277
			Real estate and rental and leasing			100.444	99.3435	101.382	104.084	104.672	102.694	100.604	98.9301	98.8196	99.4042	99.6397	101.119	100.665	99.2929	100.004	100	100.127	100.002	99.9277	99.1862	98.1218
				Real estate		100.545	99.4366	101.471	104.172	104.748	102.753	100.643	98.9524	98.8285	99.4054	99.6397	101.119	100.665	99.2929	100.004	100	100.127	100.002	99.9277	99.1862	98.1218
					Housing	100.545	99.4366	101.471	104.172	104.748	102.753	100.643	98.9524	98.8285	99.4054	99.6397	101.119	100.665	99.2929	100.004	100	100.127	100.002	99.9277	99.1862	98.1218
					Other real estate	100.545	99.4366	101.471	104.172	104.748	102.753	100.643	98.9524	98.8285	99.4054	99.6397	101.119	100.665	99.2929	100.004	100	100.127	100.002	99.9277	99.1862	98.1218
				Rental and leasing services and lessors of intangible assets		100.324	99.2338	101.276	103.979	104.578	102.616	100.549	98.9047	98.8101	99.4019	99.6397	101.119	100.665	99.2929	100.004	100	100.127	100.002	99.9277	99.1862	98.1218
		Professional and business services				131.694	127.59	129.869	132.763	132.821	127.368	120.035	113.1	110.227	109.151	107.639	107.74	106.282	102.083	101.611	100	98.9371	97.6059	96.5169	94.9088	92.8956
			Professional, scientific, and technical services			133.985	129.751	132.065	134.979	134.997	129.264	121.532	114.152	111.027	109.82	108.179	108.168	106.637	102.245	101.701	100	98.8715	97.4685	96.3188	94.6549	92.5814
				Legal services		100.545	99.4366	101.471	104.172	104.748	102.753	100.643	98.9524	98.8285	99.4054	99.6397	101.119	100.665	99.2929	100.004	100	100.127	100.002	99.9277	99.1862	98.1218
				Computer systems design and related services		135.505	131.169	133.508	136.446	136.428	130.478	122.418	114.753	111.489	110.207	108.483	108.414	106.835	102.335	101.747	100	98.847	97.4103	96.2204	94.54	92.4364
				Miscellaneous professional, scientific, and technical services		104.865	103.153	105.01	107.466	108.166	106.214	103.953	101.509	100.948	101.208	101.256	102.446	101.999	100.037	100.533	100	99.5053	98.9655	98.8344	97.5666	96.2551
			Management of companies and enterprises			100.545	99.4366	101.471	104.172	104.748	102.753	100.643	98.9524	98.8285	99.4054	99.6397	101.119	100.665	99.2929	100.004	100	100.127	100.002	99.9277	99.1862	98.1218
			Administrative and waste management services			105.9	103.428	105.095	107.709	108.14	105.906	103.404	101.317	100.948	101.403	101.438	102.751	102.062	100.148	100.531	100	99.711	99.2426	98.8277	97.9118	96.6948
				Administrative and support services		106.033	103.466	105.12	107.731	108.16	105.925	103.421	101.333	100.964	101.418	101.452	102.764	102.073	100.155	100.536	100	99.7067	99.2355	98.8189	97.9025	96.6852
				Waste management and remediation services		100.545	99.4366	101.471	104.172	104.748	102.753	100.643	98.9524	98.8285	99.4054	99.6397	101.119	100.665	99.2929	100.004	100	100.127	100.002	99.9277	99.1862	98.1218
		Educational services, health care, and social assistance				45.4278	48.2434	53.3343	57.2977	62.2898	66.0459	69.9572	73.4144	77.8519	81.8746	85.3372	88.4233	91.7693	93.3968	96.9102	100	102.001	103.031	104.376	105.267	106.671
			Educational services			37.8722	41.0555	46.1737	50.055	55.1055	59.2318	63.8458	67.9932	73.145	77.7871	81.8846	85.306	89.4936	91.8193	96.0394	100	102.601	104.026	105.857	107.329	109.659
			Health care and social assistance			100.545	99.4366	101.471	104.172	104.748	102.753	100.643	98.9524	98.8285	99.4054	99.6397	101.119	100.665	99.2929	100.004	100	100.127	100.002	99.9277	99.1862	98.1218
				Ambulatory health care services		100.545	99.4366	101.471	104.172	104.748	102.753	100.643	98.9524	98.8285	99.4054	99.6397	101.119	100.665	99.2929	100.004	100	100.127	100.002	99.9277	99.1862	98.1218
				Hospitals and nursing and residential care facilities		100.545	99.4366	101.471	104.172	104.748	102.753	100.643	98.9524	98.8285	99.4054	99.6397	101.119	100.665	99.2929	100.004	100	100.127	100.002	99.9277	99.1862	98.1218
					Hospitals	100.545	99.4366	101.471	104.172	104.748	102.753	100.643	98.9524	98.8285	99.4054	99.6397	101.119	100.665	99.2929	100.004	100	100.127	100.002	99.9277	99.1862	98.1218
					Nursing and residential care facilities	100.545	99.4366	101.471	104.172	104.748	102.753	100.643	98.9524	98.8285	99.4054	99.6397	101.119	100.665	99.2929	100.004	100	100.127	100.002	99.9277	99.1862	98.1218
				Social assistance		100.545	99.4366	101.471	104.172	104.748	102.753	100.643	98.9524	98.8285	99.4054	99.6397	101.119	100.665	99.2929	100.004	100	100.127	100.002	99.9277	99.1862	98.1218
		Arts, entertainment, recreation, accommodation, and food services				129.333	132.211	131.137	130.563	132.178	131.874	135.464	135.262	132.922	122.821	101.367	102.903	102.478	100.659	99.9605	100	99.9499	100.026	99.9349	99.3868	97.9122
			Arts, entertainment, and recreation			100.545	99.4366	101.471	104.172	104.748	102.753	100.643	98.9524	98.8285	99.4054	99.6397	101.119	100.665	99.2929	100.004	100	100.127	100.002	99.9277	99.1862	98.1218
				Performing arts, spectator sports, museums, and related activities		100.545	99.4366	101.471	104.172	104.748	102.753	100.643	98.9524	98.8285	99.4054	99.6397	101.119	100.665	99.2929	100.004	100	100.127	100.002	99.9277	99.1862	98.1218
				Amusements, gambling, and recreation industries		100.545	99.4366	101.471	104.172	104.748	102.753	100.643	98.9524	98.8285	99.4054	99.6397	101.119	100.665	99.2929	100.004	100	100.127	100.002	99.9277	99.1862	98.1218
			Accommodation and food services			128.765	132.244	130.478	128.824	130.752	131.452	140.29	142.293	139.106	126.658	101.831	103.378	102.96	101.031	99.949	100	99.9056	100.055	99.9561	99.4973	97.8491
		Other services, except government				49.6333	51.6896	54.0185	56.4137	59.698	62.7569	65.6591	67.9289	71.1211	74.7403	78.5242	83.7735	89.0012	91.8308	95.4638	100	103.646	106.705	110.604	114.397	118.706
	Government					102.238	100.586	103.329	106.358	106.044	104.028	102.55	100.971	101.185	101.633	101.774	103.183	101.128	100.052	100.572	100	100.27	100.006	99.2621	97.7564	96.8383
		Federal				94.4941	93.7865	96.8883	100.195	99.6943	99.4595	99.2614	98.2601	99.3985	100.146	100.579	101.869	101.206	100.194	100.512	100	100.069	100.177	100.793	100.286	99.2592
			General government			94.0291	93.3482	96.5253	99.8771	99.2387	99.1623	99.14	98.2141	99.4976	100.26	100.713	101.98	101.298	100.322	100.58	100	100.061	100.202	100.917	100.443	99.4212
				National defense		92.8005	91.5659	93.8692	97.2981	96.837	97.0131	97.1963	96.2893	98.215	99.4853	100.141	101.934	100.363	99.6352	100.272	100	99.4312	99.1258	99.0598	98.1061	96.7138
				Nondefense		95.5054	95.1611	98.8875	102.218	101.461	101.177	100.935	99.991	100.667	100.978	101.251	102.058	102.146	100.947	100.859	100	100.626	101.167	102.589	102.559	101.89
			Government enterprises			99.5298	98.5226	100.854	103.796	104.531	102.554	100.473	98.7573	98.6449	99.2632	99.5467	101.005	100.482	99.1949	100.004	100	100.127	100.002	99.9277	99.1862	98.1218
		State and local				109.337	106.559	108.837	111.574	111.425	107.76	105.141	103.076	102.518	102.72	102.637	104.134	101.064	99.9405	100.629	100	100.448	99.9213	98.2762	96.1259	95.2781
Private goods-producing industries						2286.88	1546.75	1085.76	788.223	569.026	485.434	384.184	318.388	274.68	224.624	182.508	143.732	127.586	114.789	106.472	100	96.3776	91.9482	87.5068	82.4597	81.367
Private services-producing industries						125.459	123.944	122.961	122.158	121.552	119.732	117.348	113.804	109.512	106.964	105.13	104.122	104.046	101.573	100.791	100	99.579	98.4149	96.1095	94.4817	92.232
U.S. Bureau of Economic Analysis

[truncated: 5 more sheets: Table 10, Table 11, Table 12, Table 13, Table 14]
